# Supplementary material for: Association of Mycoplasma canis with Fertility Disorders in Dogs: A Case Study Supported by Clinical Examination, PCR, 16S Microbiota Profiling, and Serology
Source: MDPI journal article supplement (doi:10.3390/pathogens13050391), 2024-05-08
Supplement: s1 [file s1]

**Figure S1.** Clustal Omega alignment of the nine partial *M. canis* neuraminidase gene sequences (denoted with number corresponding to patient number). Selected publicly available and annotated neuraminidase gene sequences of other *M. canis* strains were included for comparison.

|         |                                                                |     |
|---------|----------------------------------------------------------------|-----|
| Larissa | ATGAAAAAAAAATTAATAAAAAATTAGCTGTATATCTGCTCTTATCAGGAGCACTTATAACA | 60  |
| 16      | -----                                                          | 0   |
| 10      | -----                                                          | 0   |
| UFG1    | ATGAAAAAAAAATTAATAAAAAATTAGCTGTATATCTGCTCTTATCAGGAGCACTTATAACA | 60  |
| 3       | -----                                                          | 0   |
| UF31    | ATGAAAAAAAAATTAATAAAAAATTAGCTGTATATCTGCTCTTATCAGGAGCACTTATAACA | 60  |
| UF33    | ATGAAAAAAAAATTAATAAAAAATTAGCTGTATATCTGCTCTTATCAGGAGCACTTATAACA | 60  |
| PG14T   | ATGAAAAAAAAATTAATAAAAAATTAGCTGTATATCTGCTCTTATCAGGAGCACTTATAACA | 60  |
| 23      | -----                                                          | 0   |
| UFG4    | ATGAAAAAAAAATTAATAAAAAATTAGCTGTATATCCGCTCTTATCAGGAGCACTTATAACA | 60  |
| 22      | -----                                                          | 0   |
| 13      | -----                                                          | 0   |
| 19      | -----                                                          | 0   |
| 5       | -----                                                          | 0   |
| 6       | -----                                                          | 0   |
|         |                                                                |     |
| Larissa | TCGACTTCTTTAGCAATATATTTCTATGCAAATAGTCAAAAGATTGAGAAAAAGAAGAAG   | 120 |
| 16      | -----                                                          | 0   |
| 10      | -----                                                          | 0   |
| UFG1    | TCGACTTCTTTAGCAATATATTTCTATGCAAATAGTCAAAAGATTGAGAAAAAGAAGAAG   | 120 |
| 3       | -----                                                          | 0   |
| UF31    | ACGACTTCTTTAGCAATATATTTCTATGCAAATAGTCAAAAGATTGAGAAAAAGAAGAAG   | 120 |
| UF33    | TCGACTTCTTTAGCAATATATTTCTATGCAAATAGTCAAAAGATTGAGAAAAAGAAGAAG   | 120 |
| PG14T   | TCGACTTCTTTAGCAATATATTTCTATGCAAATAGTCAAAAGATTGAGAAAAAGAAGAAG   | 120 |
| 23      | -----                                                          | 0   |
| UFG4    | TCGACTTCTTTAGCAATATATTTCTATGCAAATAGTCAAAAGATTGAGAAAAAGAAGAAG   | 120 |
| 22      | -----                                                          | 0   |
| 13      | -----                                                          | 0   |
| 19      | -----                                                          | 0   |
| 5       | -----                                                          | 0   |
| 6       | -----                                                          | 0   |
|         |                                                                |     |
| Larissa | AGCAATTCATTTTCTGATAGTCAAATTAATGGTTTTGAATTTAACATCCCTGAAAAACAT   | 180 |
| 16      | -----                                                          | 0   |
| 10      | -----                                                          | 0   |
| UFG1    | AGCAATTCATTTTCTGATAGTCAAATTAATGGTTTTGAATTTAACATCCCTGAAAAACAT   | 180 |
| 3       | -----                                                          | 0   |
| UF31    | AGCAATTCATTTTCTGATAGTCAAATTAATGGTTTTGAATTTAACATCCCTGAAAAACAT   | 180 |
| UF33    | AGCAATTCATTTTCTGATAGTCAAATTAATGGTTTTGAATTTAACATCCCTGAAAAACAT   | 180 |
| PG14T   | AGCAATTCATTTTCTGATAGTCAAATTAATGGTTTTGAATTTAACATCCCTGAAAAAGAT   | 180 |
| 23      | -----                                                          | 0   |
| UFG4    | AGCAATTCATTTTCTGATAGTCAAATTAATGGTTTTGAATTTAACATCCCTGAAAAACAT   | 180 |
| 22      | -----                                                          | 0   |
| 13      | -----                                                          | 0   |
| 19      | -----                                                          | 0   |
| 5       | -----                                                          | 0   |
| 6       | -----                                                          | 0   |

|         |                                                            |     |
|---------|------------------------------------------------------------|-----|
| Larissa | AATACTTTTGTTCTACAATAATAACCATAACGACTTTATTGAGCAACCTGAAAAAAGT | 240 |
| 16      | -----                                                      | 0   |
| 10      | -----                                                      | 0   |
| UFG1    | AATACTTTTGTTCTACAATAATAACCATAACGACTTTATTGAGCAACCTGAAAAAAGT | 240 |
| 3       | -----                                                      | 0   |
| UF31    | AATACTTTTGTTCTACAATAATAACCATAACGACTTTATTGAGCAACCTGAAAAAAGT | 240 |
| UF33    | AATATTTTGTTCCTACAATAATAACCATAACGACTTTATTGAGCAACCTGAAAAAAGT | 240 |
| PG14T   | AATACTTTTGTTCTACAATAATAACCATAACGACTTTATTGAGCAACCTGAAAAAAGT | 240 |
| 23      | -----                                                      | 0   |
| UFG4    | AATACTTTTGTTCTACAATAATAACCATAACGACTTTATTGAGCAACCTGAAAAAAGT | 240 |
| 22      | -----                                                      | 0   |
| 13      | -----                                                      | 0   |
| 19      | -----                                                      | 0   |
| 5       | -----                                                      | 0   |
| 6       | -----                                                      | 0   |

|         |                                                              |     |
|---------|--------------------------------------------------------------|-----|
| Larissa | GATGTCAAATTTTATAACTTTCAATTCAAAAAAAGTGATGTCGATGATTCTTCGTTTATA | 300 |
| 16      | -----                                                        | 0   |
| 10      | -----                                                        | 0   |
| UFG1    | GATGTCAAATTTTATAACTTTCAATTCAAAAAAAGTGATGTCGATGATTCTTCGTTTATA | 300 |
| 3       | -----                                                        | 0   |
| UF31    | GATGTCAAATTTTATAACTTTCAATTCAAAAAAAGTGATGTCGATGATTCTTCGTTTATA | 300 |
| UF33    | GATGTCAAATTTTATAACTTTCAATTCAAAAAAAGTGATGTCGATGATTCTTCGTTTATA | 300 |
| PG14T   | GATGTCAAATTTTATAACTTTCAATTCAAAAAAAGTGATGTCGATGATTCTTCGTTTATA | 300 |
| 23      | -----                                                        | 0   |
| UFG4    | GATGTCAAATTTTATAACTTTCAATTCAAAAAAAGTGATGTCGATGATTCTTCGTTTATA | 300 |
| 22      | -----                                                        | 0   |
| 13      | -----                                                        | 0   |
| 19      | -----                                                        | 0   |
| 5       | -----                                                        | 0   |
| 6       | -----                                                        | 0   |

|         |                                                             |     |
|---------|-------------------------------------------------------------|-----|
| Larissa | AGTTTGAATTTTGAAGGTACTAACTTTTATCAGAATCAAGATTACAAATTGAACTTGAG | 360 |
| 16      | -----                                                       | 0   |
| 10      | -----                                                       | 0   |
| UFG1    | AGTTTAAATTTTGAAGGTACTAACTTTTATCAGAATCAAGGTTACAAATCGAACTCGAG | 360 |
| 3       | -----                                                       | 0   |
| UF31    | AGTTTAAATTTTGAAGGTACTAACTTTTATCAGAATCAAGATTACAAATCGAACTCGAG | 360 |
| UF33    | AGTTTAAATTTTGAAGGTACTAACTTTTATCAGAATCAAGGTTACAAATCGAACTCGAG | 360 |
| PG14T   | AGTTTAAATTTTGAAGGTACTAACTTTTATCAGAATCAAGATTACAAATTGAACTTGAG | 360 |
| 23      | -----                                                       | 0   |
| UFG4    | AGTTTAAATTTTGAAGGTACTAACTTTTATCAGAATCAAGATTACAAATTGAACTTGAG | 360 |
| 22      | -----                                                       | 0   |
| 13      | -----                                                       | 0   |
| 19      | -----                                                       | 0   |
| 5       | -----                                                       | 0   |
| 6       | -----                                                       | 0   |

|         |                                                                |     |
|---------|----------------------------------------------------------------|-----|
| Larissa | GACAACAATAAAAAATTTAGTCGTTTTAGATAAGTTTAAAAATCAATAACGAGAACAAGGAA | 420 |
| 16      | -----                                                          | 0   |
| 10      | -----                                                          | 0   |
| UFG1    | GACAACAATAAAAAATTTAGTCGTTTTAGATAAGTTTCGAGATCAATAACGAAAGCAAGGAA | 420 |
| 3       | -----                                                          | 0   |
| UF31    | GACAACAATAAAAAATTTAGTCGTTTTAGATAAGTTTAAAAATCAATAACGAAAACAAGGAA | 420 |
| UF33    | GACAACAATAAAAAATTTAGTCGTTTTAGATAAGTTTCGAGATCAATAACGAAAGCAAGGAA | 420 |
| PG14T   | GACAACAATAAAAAATTTAGTCGTTTTAGATAAGTTTAAAAATCAATAACGAGAACAAGGAA | 420 |
| 23      | -----                                                          | 0   |
| UFG4    | GACAACAATAAAAAATTTAGTCGTTTTAGATAAGTTTAAAAATCAATAACGAGAACAAGGAA | 420 |
| 22      | -----                                                          | 0   |
| 13      | -----                                                          | 0   |
| 19      | -----                                                          | 0   |
| 5       | -----                                                          | 0   |
| 6       | -----                                                          | 0   |

|         |                                                               |     |
|---------|---------------------------------------------------------------|-----|
| Larissa | GTTGTTTTTGATACTAGTGATCTAACTAATAACAGAAAAGTTCAATGTCAAGACAATTACT | 480 |
| 16      | -----                                                         | 0   |
| 10      | -----                                                         | 0   |
| UFG1    | GTTGTTTTTGATGCTAGTGATCTAACTAATAACAGAAAAGTTCAATGTCAAGACAATTACT | 480 |
| 3       | -----                                                         | 0   |
| UF31    | GTTGTTTTTGATACTAGTGATCTAACTAATAACAGAAAAGTTCAATGTCAAGACAATTACT | 480 |
| UF33    | GTTGTTTTTGATGCTAGTGATCTAACTAATAACAGAAAAGTTCAATGTCAAGACAATTACT | 480 |
| PG14T   | GTTATTTTTGATACTAGTGATCTAACTAATAATAGAAAAGTTCAATGTCAAGACAATTACT | 480 |
| 23      | -----                                                         | 0   |
| UFG4    | GTTGTTTTTGATACTAGTGATCTAACTAATAACAGAAAAGTTCAATGTCAAGACAATTACT | 480 |
| 22      | -----                                                         | 0   |
| 13      | -----                                                         | 0   |
| 19      | -----                                                         | 0   |
| 5       | -----                                                         | 0   |
| 6       | -----                                                         | 0   |

|         |                                                              |     |
|---------|--------------------------------------------------------------|-----|
| Larissa | TTAAATGATCAATTAATTAATAATGATAACGACATTGATGATGATGCTGAGAAAATTTCA | 540 |
| 16      | -----                                                        | 0   |
| 10      | -----                                                        | 0   |
| UFG1    | TTAAATGATCAATTAATTAATAATGATAACGACATTGATGATGATACTGAGAAAATTTCA | 540 |
| 3       | -----                                                        | 0   |
| UF31    | TTAAATGATCAATTAATTAATAATGATAACGACATTGATGATGATACTGAGAAAATTTCA | 540 |
| UF33    | TTAAATGATCAATTAATTAATAATGATAACGACATTGATGATGATACTGAGAAAATTTCA | 540 |
| PG14T   | TTAAATGATCAATTAATTAATAATGATAACGACATTGATGATGATGCTGAGAAAATTTCA | 540 |
| 23      | -----                                                        | 0   |
| UFG4    | TTAAATGATCAATTAATTAATAATGATAACGACATTGATGATGATGCTGAGAAAATTTCA | 540 |
| 22      | -----                                                        | 0   |
| 13      | -----                                                        | 0   |
| 19      | -----                                                        | 0   |
| 5       | -----                                                        | 0   |
| 6       | -----                                                        | 0   |

|         |                                                               |     |
|---------|---------------------------------------------------------------|-----|
| Larissa | TTTTCTACAATCCCATCAAATACTTTTATAGTTTTCGAAAAACAGTAGGATTATTGAATCA | 600 |
| 16      | -----                                                         | 0   |
| 10      | -----                                                         | 0   |
| UFG1    | TTTTCTACAATCCCATCAAATACTTTTATAGTTTTCGAAAAACAGTAGGATTATTGAATCA | 600 |
| 3       | -----                                                         | 0   |
| UF31    | TTTTCTACAATCCCATCAAATACTTTTATAGTTTTCGAAAAACAGTAGGATTATTGAATCA | 600 |
| UF33    | TTTTCTACAATCCCATCAAATACTTTTATAGTTTTCGAAAAACAGTAGGATTATTGAATCA | 600 |
| PG14T   | TTTTCTACAATCCCATCAAATACTTTTATAGTTTTCGAAAAACAGTAGGATTATTGAATCA | 600 |
| 23      | -----                                                         | 0   |
| UFG4    | TTTTCTACAATCCCATCAAATACTTTTATAGTTTTCGAAAAACAGTAGGATTATTGAATCA | 600 |
| 22      | -----                                                         | 0   |
| 13      | -----                                                         | 0   |
| 19      | -----                                                         | 0   |
| 5       | -----                                                         | 0   |
| 6       | -----                                                         | 0   |

|         |                                                             |     |
|---------|-------------------------------------------------------------|-----|
| Larissa | AATGAAAATTCAGCCACTATTGAAATAGAGTTAAAACTCAAGATAATATAAAAGAAATT | 660 |
| 16      | -----                                                       | 0   |
| 10      | -----                                                       | 0   |
| UFG1    | AATGAAAATTCAGCCACTATTGAAATAGAGTTAAAACTCAAGATAATATAAAAGAAATT | 660 |
| 3       | -----                                                       | 0   |
| UF31    | AATGAAAATTCAGCCACTATTGAAATAGAGTTAAAACTCAAGATAATATAAAAGAAATT | 660 |
| UF33    | AATGAAAATTCAGCCACTATTGAAATAGAGTTAAAACTCAAGATAATATAAAAGAAATT | 660 |
| PG14T   | AATGAAAATTCAGCCACTATTGAAATAGAGTTAAAACTCAAGATAATATAAAAGAAATT | 660 |
| 23      | -----                                                       | 0   |
| UFG4    | AATGAAAATTCAGCCACTATTGAAATAGAGTTAAAACTCAAGATAATATAAAAGAAATT | 660 |
| 22      | -----                                                       | 0   |
| 13      | -----                                                       | 0   |
| 19      | -----                                                       | 0   |
| 5       | -----                                                       | 0   |
| 6       | -----                                                       | 0   |

|         |                                                              |     |
|---------|--------------------------------------------------------------|-----|
| Larissa | TCAAAAAGTGCAGTGTCCCTTTTCGTTTGCATACAAAAACAATAATTCTAAAACTATCTT | 720 |
| 16      | -----                                                        | 0   |
| 10      | -----                                                        | 0   |
| UFG1    | TCAAAAAGTGCAGTGTCCCTTTTCGTTTGCATACAAAAACAATAATTCTAAAACTATCTT | 720 |
| 3       | -----                                                        | 0   |
| UF31    | TCAAAAAGTGCAGTGTCCCTTTTCGTTTGCATACAAAAACAATAATTCTAAAACTATCTT | 720 |
| UF33    | TCAAAAAGTGCAGTGTCCCTTTTCGTTTGCATACAAAAACAATAATTCTAAAACTATCTT | 720 |
| PG14T   | TCAAAAAGTGCAGTGTCCCTTTTCGTTTGCATACAAAAACAATAATTCTAAAACTATCTT | 720 |
| 23      | -----                                                        | 0   |
| UFG4    | TCAAAAAGTGCAGTGTCCCTTTTCGTTTGCATACAAAAACAATAATTCTAAAACTATCTT | 720 |
| 22      | -----                                                        | 0   |
| 13      | -----                                                        | 0   |
| 19      | -----                                                        | 0   |
| 5       | -----                                                        | 0   |
| 6       | -----                                                        | 0   |

|         |                                                              |     |
|---------|--------------------------------------------------------------|-----|
| Larissa | AATATAACTGGTATTTTAAATAAAAAACAAGACAAAATATTTATAACAGCTAATTTAAAT | 780 |
| 16      | -----                                                        | 0   |
| 10      | -----                                                        | 0   |
| UFG1    | AATATAACTGGTATTTTAAATAAAAAACAAGACAAAATATTTATAACAGCTAATTTAAAT | 780 |
| 3       | -----                                                        | 0   |
| UF31    | AATATAACTGGTATTTTAAATAAAAAACAAGACAAAATATTTATAACAGCTAATTTAAAT | 780 |
| UF33    | AATATAACTGGTATTTTAAATAAAAAACAAGACAAAATATTTATAACAGCTAATTTAAAT | 780 |
| PG14T   | AATATAACTGGTATTTTAAATAAAAAACAAGACAAAATATTTATAACAGCTAATTTAAAT | 780 |
| 23      | -----                                                        | 0   |
| UFG4    | AATATAACTGGTATTTTAAATAAAAAACAAGACAAAATATTTATAACAGCTAATTTAAAT | 780 |
| 22      | -----                                                        | 0   |
| 13      | -----                                                        | 0   |
| 19      | -----                                                        | 0   |
| 5       | -----                                                        | 0   |
| 6       | -----                                                        | 0   |

|         |                                                              |     |
|---------|--------------------------------------------------------------|-----|
| Larissa | AATTTAATACATGGAGAGTCATATTTTTTAGAAAAGGCAAAATTTATTAGTAAGCCAAAA | 840 |
| 16      | -----                                                        | 0   |
| 10      | -----                                                        | 0   |
| UFG1    | AATTTAATACATGGGGAGTCATATTTTTTAGAAAAGGCAAAATTTATTAGTAAGCCAAAA | 840 |
| 3       | -----                                                        | 0   |
| UF31    | AATTTAATACATGGGGAGTCATATTTTTTAGAAAAGGCAAAATTTATTAGTAAGCCAAAA | 840 |
| UF33    | AATTTAATACATGGGGAGTCATATTTTTTAGAAAAGGCAAAATTTATTAGTAAGCCAAAA | 840 |
| PG14T   | AATTTAATACATGGGGAGTCATATTTTTTAGAAAAGGCAAAATTTATTAGTAAGCCAAAA | 840 |
| 23      | -----                                                        | 0   |
| UFG4    | AATTTAATACATGGGGAGTCATATTTTTTAGAAAAGGCAAAATTTATTAGTAAGCCAAAA | 840 |
| 22      | -----                                                        | 0   |
| 13      | -----                                                        | 0   |
| 19      | -----                                                        | 0   |
| 5       | -----                                                        | 0   |
| 6       | -----                                                        | 0   |

|         |                                                             |     |
|---------|-------------------------------------------------------------|-----|
| Larissa | GGATTGTTTTATAACATCAATAATAACTATGAAAACGCTTTTTATGACTTTAACAATCA | 900 |
| 16      | -----                                                       | 0   |
| 10      | -----                                                       | 0   |
| UFG1    | GGATTGTTTTATAACATCAATAATAACTATGAAAACGCTTTTTATGACTTTAACAATCA | 900 |
| 3       | -----                                                       | 0   |
| UF31    | GGATTGTTTTATAACATCAATAATAACTATGAAAACGCTTTTTATGACTTTAACAATCA | 900 |
| UF33    | GGATTGTTTTATAACATCAATAATAACTATGAAAACGCTTTTTATGACTTTAACAATCA | 900 |
| PG14T   | GGATTGTTTTATAACATCAATAATAACTATGAAAACGCTTTTTATGACTTTAACAATCA | 900 |
| 23      | -----                                                       | 0   |
| UFG4    | GGATTGTTTTATAACATCAATAATAACTATGAAAACGCTTTTTATGACTTTAACAATCA | 900 |
| 22      | -----                                                       | 0   |
| 13      | -----                                                       | 0   |
| 19      | -----                                                       | 0   |
| 5       | -----                                                       | 0   |
| 6       | -----                                                       | 0   |

|         |                                                              |     |
|---------|--------------------------------------------------------------|-----|
| Larissa | AATAATAAAGAACACGAATTCGTAATACACACAGACTCGGAAACATTATTTAAAAATAAC | 960 |
| 16      | -----                                                        | 0   |
| 10      | -----                                                        | 0   |
| UFG1    | AATAATAAAGAACATGAATTCGTAATACACACAGATTCAGAAACATTATTTAAAAATAAC | 960 |
| 3       | -----                                                        | 0   |
| UF31    | AATAATAAAGAACACGAATTCGTAATACACACAGATTCAGAAACATTATTTAAAAATAAC | 960 |
| UF33    | AATAATAAAGAACACGAATTCGTAATACACACAGATTCAGAAACATTGTTTAAAAATAAC | 960 |
| PG14T   | AATAATAAAGAACACGAATTCGTAATACACACAGATTCAGAAACATTGTTTAAAAATAAC | 960 |
| 23      | -----                                                        | 0   |
| UFG4    | AATAATAAAGAACACGAATTCGTAATACACACAGACTCGGAAACATTATTTAAAAATAAC | 960 |
| 22      | -----                                                        | 0   |
| 13      | -----                                                        | 0   |
| 19      | -----                                                        | 0   |
| 5       | -----                                                        | 0   |
| 6       | -----                                                        | 0   |

|         |                                                              |      |
|---------|--------------------------------------------------------------|------|
| Larissa | TCTAAATTTCAATTTGAGGTTATTGGAGAAATGAAAAACGATCCATTTGAAAATGATCAA | 1020 |
| 16      | -----                                                        | 0    |
| 10      | -----                                                        | 0    |
| UFG1    | TCTAAATTTGAATTTGAGGTTATTGGAGAAATGAAAAATGATCCATTTGAAAATGATCAA | 1020 |
| 3       | -----                                                        | 0    |
| UF31    | TCTAAATTTGAATTTGAGGTTATTGGAGAAATGAAAAATGATCCATTTGAAAATGATCAA | 1020 |
| UF33    | TCTAAATTTGAATTTGAGGTTATTGGTGAAATGAAAAGCGATCCATTTGAAAATGATCAA | 1020 |
| PG14T   | TCTAAATTTGAATTTGAGGTTATTGGTGAAATGAAAAGCGATCCATTTGAAAATGATCAA | 1020 |
| 23      | -----                                                        | 0    |
| UFG4    | TCTAAATTTGAATTTGAGGTTATTGGAGAAATGAAAAATGATCCATTTGAAAATGATCAA | 1020 |
| 22      | -----                                                        | 0    |
| 13      | -----                                                        | 0    |
| 19      | -----                                                        | 0    |
| 5       | -----                                                        | 0    |
| 6       | -----                                                        | 0    |

|         |                                                               |      |
|---------|---------------------------------------------------------------|------|
| Larissa | AATGAAATTAAATATCACTTAAGTGGTGTTGTTTTAGATAAAAAGAAAAATTGATTTTTCT | 1080 |
| 16      | -----                                                         | 0    |
| 10      | -----                                                         | 0    |
| UFG1    | AATGAAATTAAATATCACTTAAGTGGTGTTGTTTTAGATAAAAAGAAAAATTGATTTTTCT | 1080 |
| 3       | -----                                                         | 0    |
| UF31    | AATGAAATTAAATATCACTTAAGTGGTGTTGTTTTAGATAAAAAGAAAAATTGATTTTTCT | 1080 |
| UF33    | AATGAAATTAAATATCACTTAAGTGGTGTTGTTTTAGATAAAAAGAAAAATTGATTTTTCT | 1080 |
| PG14T   | AATGAAATTAAATATCACTTAAGTGGTGTTGTTTTGGATAAAAAGAAAAATTGATTTTTCT | 1080 |
| 23      | -----                                                         | 0    |
| UFG4    | AATGAAATTAAATATCACTTAAGTGGTGTTGTTTTAGATAAAAAGAAAAATTGATTTTTCT | 1080 |
| 22      | -----                                                         | 0    |
| 13      | -----                                                         | 0    |
| 19      | -----                                                         | 0    |
| 5       | -----                                                         | 0    |
| 6       | -----                                                         | 0    |

|         |                                                             |      |
|---------|-------------------------------------------------------------|------|
| Larissa | AAAATTAACGAAAATCTAAGACTAAAATTTTCTAAAGTCGGTAGTGAAGAACTGATGTT | 1140 |
| 16      | -----                                                       | 0    |
| 10      | -----                                                       | 0    |
| UFG1    | AAAATTAATGAAAATCTAAAACTAAAATTTTCTAAAGTCGGTAGTGAAGAACTGATGTT | 1140 |
| 3       | -----                                                       | 0    |
| UF31    | AAAATTAATGAAAATCTAAAACTAAAATTTTCTAAAGTCGGTAGCGAAGAACTGATGTT | 1140 |
| UF33    | AAAATTAATGAAAATCTAAAACTAAAATTTTCTAAAGTCGGTAGCGAAGAACTGATGTT | 1140 |
| PG14T   | AAAATTAATGAAAATCTAAAACTAAAATTTTCTAAAGTCGGTAGCGAAGAACTGATGTT | 1140 |
| 23      | -----                                                       | 0    |
| UFG4    | AAAATTAATGAAAATCTAAAACTAAAATTTTCTAAAGTCGGTAGTGAAGAACTGATGTT | 1140 |
| 22      | -----                                                       | 0    |
| 13      | -----                                                       | 0    |
| 19      | -----                                                       | 0    |
| 5       | -----                                                       | 0    |
| 6       | -----                                                       | 0    |

|         |                                                              |      |
|---------|--------------------------------------------------------------|------|
| Larissa | TACGCCTCAAAAATAAGTTATGACCCAAATGAAAATAAACTTTCTTTTGAGATTGAAAAT | 1200 |
| 16      | -----                                                        | 0    |
| 10      | -----                                                        | 0    |
| UFG1    | TACGCCTCAAAAATAAGTTATGACCCAAATGAAAATAAACTTTCTTTTGAGATAGAAAAT | 1200 |
| 3       | -----                                                        | 0    |
| UF31    | TACGCCTCAAAAATAAGTTATGACCCAAATGAAAATAAACTTTCTTTTGAGATCGAAAAT | 1200 |
| UF33    | TACGCCTCAAAAATAAGTTATGACCCAAATGAAAATAAACTTTCTTTTGAGATCGAAAAT | 1200 |
| PG14T   | TACGCCTCAAAAATAAGTTATGACCCAAATGAAAATAAGCTTTCTTTTGAGATAGAAAAT | 1200 |
| 23      | -----                                                        | 0    |
| UFG4    | TACGCCTCAAAAATAAGTTATGACCCAAATGAAAATAAACTTTCTTTTAAGATTGAAAAT | 1200 |
| 22      | -----                                                        | 0    |
| 13      | -----                                                        | 0    |
| 19      | -----                                                        | 0    |
| 5       | -----                                                        | 0    |
| 6       | -----                                                        | 0    |

|         |                                                              |      |
|---------|--------------------------------------------------------------|------|
| Larissa | TCAAATAGTGGTGACCAATTTATATTTAAAGAAATACAAGTAAAAAATAATGAAACAGAA | 1260 |
| 16      | -----                                                        | 0    |
| 10      | -----                                                        | 0    |
| UFG1    | TCAAATAGTGGTGACCAATTTATATTTAAAGAAATACAAGTAAAAAATAATGAAACAGAA | 1260 |
| 3       | -----                                                        | 0    |
| UF31    | TCAAATAGTGGTGACCAATTTATATTTAAAGAAATACAAGTAAAAAATAATGAAACAGAA | 1260 |
| UF33    | TCAAATAGTGGTGACCAATTTATATTTAAAGAAATACAAGTAAAAAATAATGAAACAGAA | 1260 |
| PG14T   | TCAAATAGTGGTGACCAATTTATATTTAAAGAAATACAAGTAAAAAATAATGAAACAGAA | 1260 |
| 23      | -----                                                        | 0    |
| UFG4    | TCAAATAGTGGTGACCAATTTATATTTAAAGAAATACAAGTAAAAAATAATGAAACAGAA | 1260 |
| 22      | -----                                                        | 0    |
| 13      | -----                                                        | 0    |
| 19      | -----                                                        | 0    |
| 5       | -----                                                        | 0    |
| 6       | -----                                                        | 0    |

|         |                                                               |      |
|---------|---------------------------------------------------------------|------|
| Larissa | CAGTTTGAGAACTTAGATATAACTAATGTTGATAAAAAAACTAATTATTGAATATCCGATT | 1320 |
| 16      | -----                                                         | 0    |
| 10      | -----                                                         | 0    |
| UFG1    | CAGTTTGAGAACTTAGATATAACTAATGTTGATAAAAAAACTAATTATTGAATATCCGATT | 1320 |
| 3       | -----                                                         | 0    |
| UF31    | CAGTTTGAGAACTTAGATATAACTAATGTTGATAAAAAAACTAATTATTGAATATCCGATT | 1320 |
| UF33    | CAGTTTGAGAACTTAGATATAACTAATGTTGATAAAAAAACTAATTATTGAATATCCGATT | 1320 |
| PG14T   | CAGTTTGAGAACTTAGATATAACTAATGTTGATAAAAAAACTAATTATTGAATATCCGATT | 1320 |
| 23      | -----                                                         | 0    |
| UFG4    | CAGTTTGAGAACTTAGATATAACTAATGTTGATAAAAAAACTAATTATTGAATATCCGATT | 1320 |
| 22      | -----                                                         | 0    |
| 13      | -----                                                         | 0    |
| 19      | -----                                                         | 0    |
| 5       | -----                                                         | 0    |
| 6       | -----                                                         | 0    |

|         |                                                              |      |
|---------|--------------------------------------------------------------|------|
| Larissa | TCTAAATCGCTTGAAGTTGATTTGATAAATTCAAGATCATGAGAGTCTTCTTTATACCCG | 1380 |
| 16      | -----                                                        | 0    |
| 10      | -----                                                        | 0    |
| UFG1    | TCTAAATCGCTTGAAGTTGATTTAATAAATTCAAGATCATGAGAGTCTTCTTTATACCCG | 1380 |
| 3       | -----                                                        | 0    |
| UF31    | TCTAAATCGCTTGAAGTTGATTTGATAAATTCAAGATCATGAGAGTCTTCTTTATACCCG | 1380 |
| UF33    | TCTAAATCGCTTGAAGTTGATTTGATAAATTCAAGATCATGAGAGTCTTCTTTATACCCG | 1380 |
| PG14T   | TCTAAATCGCTTGAAGTTGATTTGATAAATTCAAGATCATGAGAGTCTTCTTTATACCCG | 1380 |
| 23      | -----                                                        | 0    |
| UFG4    | TCTAAATCGCTTGAAGTTGATTTGATAAATTCAAGATCATGAGAGTCTTCTTTATACCCA | 1380 |
| 22      | -----                                                        | 0    |
| 13      | -----                                                        | 0    |
| 19      | -----                                                        | 0    |
| 5       | -----                                                        | 0    |
| 6       | -----                                                        | 0    |

|         |                                                              |      |
|---------|--------------------------------------------------------------|------|
| Larissa | AGTTACGTATTTATTAATTTAAAATTAAAAAATAATTGAAATGATGAAAAAATCGAAAAG | 1440 |
| 16      | -----                                                        | 0    |
| 10      | -----                                                        | 0    |
| UFG1    | AGTTACGTATTTATTAATTTAAAATTAAAAAATAATTGAAATGATGAAAAAATCGAAAAG | 1440 |
| 3       | -----                                                        | 0    |
| UF31    | AGTTACGTATTTATTAATTTAAAATTAAAAAATAATTGAAATGATGAAAAAATCGAAAAG | 1440 |
| UF33    | AGTTACGTATTTATTAATTTAAAATTAAAAAATAATTGAAATGATGAAAAAATCGAAAAG | 1440 |
| PG14T   | AGTTACGTATTTATTAATTTAAAATTAAAAAATAATTGAAATGATGAAAAAATCGAAAAG | 1440 |
| 23      | -----                                                        | 0    |
| UFG4    | AGTTACGTATTTATTAATTTAAAATTAAAAAATAATTGAAATAATGAAAAAATCGAAAAA | 1440 |
| 22      | -----                                                        | 0    |
| 13      | -----                                                        | 0    |
| 19      | -----                                                        | 0    |
| 5       | -----                                                        | 0    |
| 6       | -----                                                        | 0    |



|         |                                                              |      |
|---------|--------------------------------------------------------------|------|
| Larissa | TTACTTGATCAATTAACGAAAGATGATTATTCGGAATCCAAAAAGAATTCAATAAAGAAT | 1500 |
| 16      | -----                                                        | 0    |
| 10      | -----                                                        | 0    |
| UFG1    | TTACTTGATCAATTAACAAAAAATGATTATTCAGAATCCAAAAAGAATTCAATAAAGAAT | 1500 |
| 3       | -----                                                        | 0    |
| UF31    | TTACTTGATCAATTAACGAAAGATGATTATTCGGAATCCAAAAAGAATTCAATAAAGAAT | 1500 |
| UF33    | TTACTTGATCAATTAACGAAAGATGATTATTCGGAATCCAAAAAGAATTCAATAAAGAAT | 1500 |
| PG14T   | TTACTTGATCAATTAACGAAAGATGATTATTCGGAATCCAAAAAGAATTCAATAAAGAAT | 1500 |
| 23      | -----                                                        | 0    |
| UFG4    | CTACTTGATCAATTAACAAAAAATGATTATTCGGAATCCAAAAAGAATTCAATAAAGAAT | 1500 |
| 22      | -----                                                        | 0    |
| 13      | -----                                                        | 0    |
| 19      | -----                                                        | 0    |
| 5       | -----                                                        | 0    |
| 6       | -----                                                        | 0    |

|         |                                                               |      |
|---------|---------------------------------------------------------------|------|
| Larissa | GTTCTAGCAAATATTATTTATGATAATTATAAGAAAAATAGTTAAGAATAATAATGTTGAT | 1560 |
| 16      | -----                                                         | 0    |
| 10      | -----                                                         | 0    |
| UFG1    | GTTCTTGCAAATATTATTTATGACAATTATAAGAAAAATAGTTAAAAATAATAACATTGAT | 1560 |
| 3       | -----                                                         | 0    |
| UF31    | GTTCTAGCAAATATTATTTATGATAATTATAAGAAAAATAGTTAAAAATAATAATGTTGAT | 1560 |
| UF33    | GTTCTAGCAAATATTATTTATGATAATTATAAGAAAAATAGTTAAGAATAATAATGTTGAT | 1560 |
| PG14T   | GTTCTAGCAAATATTATTTATGATAATTATAAGAAAAATAGTTAAGAATAATAATGTTGAT | 1560 |
| 23      | -----                                                         | 0    |
| UFG4    | ATTCTCGCAAATATTATTTATGACAATTATAAGAAAAATAGTTAAAAATAATAACATTGAT | 1560 |
| 22      | -----                                                         | 0    |
| 13      | -----                                                         | 0    |
| 19      | -----                                                         | 0    |
| 5       | -----                                                         | 0    |
| 6       | -----                                                         | 0    |

|         |                                                               |      |
|---------|---------------------------------------------------------------|------|
| Larissa | ATTGATAATAAAATAATAATTTTAAGACTTTCTGACCCAGCTGATGATAGCAACTTTTAT  | 1620 |
| 16      | -----                                                         | 0    |
| 10      | -----                                                         | 0    |
| UFG1    | ATTGATAATAAAATAATAATTTTAAGACTTTCTGACCCAAGCTGATGATAGCAACTTTTAT | 1620 |
| 3       | -----                                                         | 0    |
| UF31    | ATTGATAATAAAATAATAATTTTAAGACTTTCTGACCCAGCTGATGATAGCAACTTTTAT  | 1620 |
| UF33    | ATTGATAATAAAATAATAATTTTAAGACTTTCTGACCCAGCTGATGATAGCAACTTTTAT  | 1620 |
| PG14T   | ATTGATAATAAAATAATAATTTTAAGACTTTCTGACCCAGCTGATGATAGCAACTTTTAT  | 1620 |
| 23      | -----                                                         | 0    |
| UFG4    | ATTGATAATAAAATAATAATTTTAAGACTTTCTGACCCAAGCTGATGATAGCAACTTTTAT | 1620 |
| 22      | -----                                                         | 0    |
| 13      | -----                                                         | 0    |
| 19      | -----                                                         | 0    |
| 5       | -----                                                         | 0    |
| 6       | -----                                                         | 0    |

|         |                                                             |      |
|---------|-------------------------------------------------------------|------|
| Larissa | AGTCAAGATAATAATATTTTTTATTTCTATTAAATGAAACTAACAAACATTTCAAAAAT | 1680 |
| 16      | -----                                                       | 0    |
| 10      | -----                                                       | 0    |
| UFG1    | AGTCAAGATAATAATATTTTTTATTTCTATTAAATGAAACTAACAAACATTTCAAAAAT | 1680 |
| 3       | -----                                                       | 0    |
| UF31    | AGTCAAGATAATAATATTTTTTATTTCTATTAAATGAAACTAACAAACATTTCAAAAAT | 1680 |
| UF33    | AGTCAAGATAATAATATTTTTTATTTCTATTAAATGAAACTAACAAACATTTCAAAAAT | 1680 |
| PG14T   | AGTCAAGATAATAATATTTTTTATTTCTATTAAATGAAACTAACAAACATTTCAAAAAT | 1680 |
| 23      | -----                                                       | 0    |
| UFG4    | AGTCAAGATAATAATATTTTTTATTTCTATTAAATGAAACTAACAAACATTTCAAAAAT | 1680 |
| 22      | -----                                                       | 0    |
| 13      | -----                                                       | 0    |
| 19      | -----                                                       | 0    |
| 5       | -----                                                       | 0    |
| 6       | -----                                                       | 0    |

|         |                                                             |      |
|---------|-------------------------------------------------------------|------|
| Larissa | ACTAAAGATATTGACGAAAAATGAGATATAGTCAATAATAGCAACACAATTTCTATTTC | 1740 |
| 16      | -----                                                       | 0    |
| 10      | -----                                                       | 0    |
| UFG1    | ACTAAAGATATTGACGAAAAATGAGATATAGTCAATAATAGCAACACAATTTCTATTTC | 1740 |
| 3       | -----                                                       | 0    |
| UF31    | ACTAAAGATATTGACGAAAAATGAGATATAGTCAATAATAGCAACACAATTTCTATTTC | 1740 |
| UF33    | ACTAAAGATATTGACGAAAAATGAGATATAGTCAATAATAGCAATACAATTTCTATTTC | 1740 |
| PG14T   | ACTAAAGATATTGACGAAAAATGAGATATAGTCAATAATAGCAACACAATTTCTATTTC | 1740 |
| 23      | -----                                                       | 0    |
| UFG4    | ACTAAAGATATTGACGAAAAATGAGATATAGTCAATAATAGCAACACAATTTCTATTTC | 1740 |
| 22      | -----                                                       | 0    |
| 13      | -----                                                       | 0    |
| 19      | -----                                                       | 0    |
| 5       | -----                                                       | 0    |
| 6       | -----                                                       | 0    |

|         |                                                              |      |
|---------|--------------------------------------------------------------|------|
| Larissa | ATGATTAAAAATCCATTTATAAGCAACAACAGAAATGGAACAGCAATTGAAAATGATCAC | 1800 |
| 16      | -----                                                        | 0    |
| 10      | -----CAATTGAAAATGATCAC                                       | 17   |
| UFG1    | ATGATTAAAAATCCATTTATAAGCAACAACAGAAATGGAACAGCTATTGAAAATGATCAC | 1800 |
| 3       | -----                                                        | 0    |
| UF31    | ATGATTAAAAATCCATTTATAAGCAACAACAGAAATGGAACAGCAATTGAAAATGATCAC | 1800 |
| UF33    | ATGATTAAAAATCCATTTATAAGCAACAACAGAAATGGAACAGCAATTGAAAATGATCAC | 1800 |
| PG14T   | ATGATTAAAAATCCATTTATAAGCAACAACAGAAATGGAACAGCAATTGAAAATGATCAC | 1800 |
| 23      | -----                                                        | 0    |
| UFG4    | ATGATTAAAAATCCATTTATAAGCAACAACAGAAATGGAACAGCTATTGAAAATGATCAC | 1800 |
| 22      | -----GGAACAGCAATTGAAAATGATCAC                                | 24   |
| 13      | -----                                                        | 0    |
| 19      | -----                                                        | 0    |
| 5       | -----                                                        | 0    |
| 6       | -----                                                        | 0    |

|         |                                                              |      |
|---------|--------------------------------------------------------------|------|
| Larissa | TTTAAATAAAAAAGACTAAGTAGCGAAACATTATTTGCTCACAACGAAGACGGATCACAC | 1860 |
| 16      | -----                                                        | 0    |
| 10      | TTTAAATAAAAAAGACTAAGTAGCGAAACATTATTTGCTCACAACGAAGACGGATCACAC | 77   |
| UFG1    | TTTAAATAAAAAAGACTAAGTAGCGAAACATTATTTGCTCACAACGAAGACGGATCGCAC | 1860 |
| 3       | -----GTAGCGAAACATTATTTGCTCACAACGAAGACGGATCACAC               | 41   |
| UF31    | TTTAAATAAAAAAGACTAAGTAGCGAAACATTATTTGCTCACAACGAAGACGGATCACAC | 1860 |
| UF33    | TTTAAATAAAAAAGACTAAGTAGCGAAACATTATTTGCTCACAACGAAGACGGATCACAC | 1860 |
| PG14T   | TTTAAATAAAAAAGACTAAGTAGCGAAACATTATTTGCTCACAACGAAGACGGATCACAC | 1860 |
| 23      | -----TAGCGAGACATTATTTGCTCACAACGAAGACGGATCACAC                | 40   |
| UFG4    | TTTAAATAAAAAAGACTAAGTAGCGAAACATTATTTGCTCACAACGAAGACGGATCACAC | 1860 |
| 22      | TTTAAATAAAAAAGACTAAGTAGCGAAACATTATTTGCTCACAACGAAGACGGATCACAC | 84   |
| 13      | -----GTAGCGAAACATTATTTGCTCACAACGAAGACGGATCACAC               | 41   |
| 19      | -----TAGCGAAACATTATTTGCTCACAACGAAGACGGATCACAC                | 40   |
| 5       | -----TAGCGAAACATTATTTGCTCACAACGAAGACGGATCACAC                | 40   |
| 6       | -----GTAGCGAAACATTATTTGCTCACAACGAAGACGGATCACAC               | 41   |

# RIP motif

|         |                                                             |      |
|---------|-------------------------------------------------------------|------|
| Larissa | TCATATCGTATCCCAATGTTACTAAACTTAAAAACGGAAAAATCCTTAGCGTTGTGGAT | 1920 |
| 16      | -----                                                       | 0    |
| 10      | TCATATCGTATCCCAATGTTACTAAACTTAAAAACGGAAAAATCCTTAGCGTTGTGGAT | 137  |
| UFG1    | TCATATCGTATCCCAATGTTACTAAACTTAAAAACGGAAAAATCCTTAGCGTTGTGGAC | 1920 |
| 3       | TCATATCGTATCCCAATGTTACTAAACTTAAAAACGGAAAAATCCTTAGCGTTGTGGAT | 101  |
| UF31    | TCATATCGTATCCCAATGTTACTAAACTTAAAAACGGAAAAATCCTTAGCGTTGTGGAT | 1920 |
| UF33    | TCATATCGTATCCCAATGTTACTAAACTTAAAAACGGAAAAATCCTTAGCGTTGTGGAT | 1920 |
| PG14T   | TCATATCGTATCCCAATGTTACTAAACTTAAAAACGGAAAAATCCTTAGCGTTGTGGAT | 1920 |
| 23      | TCATATCGTATCCCAATGTTACTAAACTTAAAAACGGAAAAATCCTTAGCGTTGTAGAT | 100  |
| UFG4    | TCATATCGTATCCCAATGTTACTAAACTTAAAAACGGAAAAATCCTTAGCGTTGTGGAT | 1920 |
| 22      | TCATATCGTATCCCAATGTTACTAAACTTAAAAACGGAAAAATCCTTAGCGTTGTGGAT | 144  |
| 13      | TCATATCGTATCCCAATGTTACTAAACTTAAAAACGGAAAAATCCTTAGCGTTGTGGAT | 101  |
| 19      | TCATATCGTATCCCAATGTTACTAAACTTAAAAACGGAAAAATCCTTAGCGTTGTGGAT | 100  |
| 5       | TCATATCGTATCCCAATGTTACTAAACTTAAAAACGGAAAAATCCTTAGCGTTGTGGAT | 100  |
| 6       | TCATATCGTATCCCAATGTTACTAAACTTAAAAACGGAAAAATCCTTAGCGTTGTGGAT | 101  |

|         |                                                              |      |
|---------|--------------------------------------------------------------|------|
| Larissa | AAAAGAGCAGAAAACATTAGTGACTATAATAACTCAATTTACAAAGTTTTTAAAGAATCA | 1980 |
| 16      | -----                                                        | 0    |
| 10      | AAAAGAGTAGAAAACATTAGTGACTATAATAACTCAATTTACAAAGTTTTTAAAGAATCA | 197  |
| UFG1    | AAAAGAGTAGAAAACATTAGTGACTATAATAACTCAATTTACAAAGTTTTTAAAGAATCA | 1980 |
| 3       | AAAAGAGTAGAAAACATTAGTGACTATAATAACTCAATTTACAAAGTTTTTAAAGAATCA | 161  |
| UF31    | AAAAGAGTAGAAAACATTAGTGACTATAATAACTCAATTTACAAAGTTTTTAAAGAAACA | 1980 |
| UF33    | AAAAGAGTAGAAAACATTAGTGACTATAATAACTCAATTTACAAAGTTTTTAAAGAATCA | 1980 |
| PG14T   | AAAAGAGTAGAAAACATTAGTGACTATAATAACTCAATTTACAAAGTTTTTAAAGAATCA | 1980 |
| 23      | AAAAGAGTAGAAAACATTAGTGACTATAATAACTCAATTTACAAAGTTTTTAAAGAATCA | 160  |
| UFG4    | AAAAGAGTAGAAAACATTAGTGACTATAATAACTCAATTTACAAAGTTTTTAAAGAATCA | 1980 |
| 22      | AAAAGAGTAGAAAACATTAGTGACTATAATAACTCAATTTACAAAGTTTTTAAAGAATCA | 204  |
| 13      | AAAAGAGTAGAAAACATTAGTGACTATAATAACTCAATTTACAAAGTTTTTAAAGAATCA | 161  |
| 19      | AAAAGAGTAGAAAACATTAGTGACTATAATAACTCAATTTACAAAGTTTTTAAAGAATCA | 160  |
| 5       | AAAAGAGTAGAAAATATTAGTGACTATAATAACTCAATTTACAAAGTTTTTAAAGAATCA | 160  |
| 6       | AAAAGAGTAGAAAATATTAGTGACTATAATAACTCAATTTACAAAGTTTTTAAAGAATCA | 161  |

|         |                                                              |      |
|---------|--------------------------------------------------------------|------|
| Larissa | TTAGATGGTGAAAAAATTGAAGCCAAAATAAAGAAATCTTAAAAATAGCTGTTCCGAAG  | 2040 |
| 16      | -----                                                        | 0    |
| 10      | TTAGATGGTGAAAAAATTGAAGTCAAAATAAAGAAATCTTAAAAATAGCTGTTCCAAAG  | 257  |
| UFG1    | TTAGATGGCGGAAAAAATTGAAGCCAAAATAAAGAAATCTTAAAAATAGCTGTTCCAAAG | 2040 |
| 3       | TTAGATGGCGGAAAAAATTGAAGCCAAAATAAAGAAATCTTAAAAATAGCTGTTCCGAAG | 221  |
| UF31    | TTAGATGGCGGAAAAAATTGAAGCCAAAATAAAGAAATCTTAAAAATAGCTGTTCCAAAG | 2040 |
| UF33    | TTAGATGGCGGAAAAAATTGAAGCCAAAATAAAGAAATCTTAAAAATAGCTGTTCCAAAG | 2040 |
| PG14T   | TTAGATGGCGGAAAAAATTGAAGCCAAAATAAAGAAATCTTAAAAATAGCTGTTCCAAAG | 2040 |
| 23      | TTAGATGGCGGAAAAAATTGAAGCCAAAATAAAGAAATCTTAAAAATAGCTGTTCCAAAG | 220  |
| UFG4    | TTAGATGGCGGAAAAAATTGAAGCCAAAATAAAGAAATCTTAAAAATAGCTGTTCCAAAG | 2040 |
| 22      | TTAGATGGCGGAAAAAATTGAAGCCAAAATAAAGAAATCTTAAAAATAGCTGTTCCAAAG | 264  |
| 13      | TTAGATGGCGGAAAAAATTGAAGCCAAAATAAAGAAATCTTAAAAATAGCTGTTCCAAAG | 221  |
| 19      | TTAGATGGCGGAAAAAATTGAAGCCAAAATAAAGAAATCTTAAAAATAGCTGTTCCAAAG | 220  |
| 5       | TTAGATGGCGGAAAAAATTGAAGCCAAAATAAAGAAATCTTAAAAATAGCTGTTCCAAAG | 220  |
| 6       | TTAGATGGCGGAAAAAATTGAAGCCAAAATAAAGAAATCTTAAAAATAGCTGTTCCAAAG | 221  |

|         |                                                              |      |
|---------|--------------------------------------------------------------|------|
| Larissa | AAAAACAATCGTGGTATAGCTATAGATGGTATAATAACAGAAGTTGAGTATTTTGATGAA | 2100 |
| 16      | -----                                                        | 0    |
| 10      | AAAAACAATCGTGGTATAGCTATAGATGGTATAATAACAGAAATTGAGTATTTTGATGAA | 317  |
| UFG1    | AAAAACAATCGTGGTATAGCTATAGATGGTATAATAACAGAAATTGAGTATTTTGATGAA | 2100 |
| 3       | AAAAACAATCGCGGTATAGCTATAGACGGTATAATAACAGAAGTTGAGTATTTTGATGAA | 281  |
| UF31    | AAAAACAATCGTGGTATAGCTATAGATGGTATAATAACAGAAATTGAGTATTTTGATGAA | 2100 |
| UF33    | AAAAACAATCGTGGTATAGCTATAGATGGTATAATAACAGAAATTGAGTATTTTGATGAA | 2100 |
| PG14T   | AAAAACAATCGTGGTATAGCTATAGATGGTATAATAACAGAAATTGAGTATTTTGATGAA | 2100 |
| 23      | AAAAACAATCGTGGTATAGCTATAGATGGTATAATAACAGAAATTGAGTATTTTGATGAA | 280  |
| UFG4    | AAAAACAATCGTGGTATAGCTATAGATGGTATAATAACAGAAATTGAGTATTTTGATGAA | 2100 |
| 22      | AAAAACAATCGTGGTATAGCTATAGATGGTATAATAACAGAAATTGAGTATTTTGATGAA | 324  |
| 13      | AAAAACAATCGTGGTATAGCTATAGATGGTATAATAACAGAAATTGAGTATTTTGATGAA | 281  |
| 19      | AAAAACAATCGTGGTATAGCTATAGATGGTATAATAACAGAAATTGAGTATTTTGATGAA | 280  |
| 5       | AAAAACAATCGTGGTATAGCTATAGATGGTATAATAACAGAAATTGAGTATTTTGATGAA | 280  |
| 6       | AAAAACAATCGCGGTATAGCTATAGATGGTATAATAACAGAAGTTGAGTATTTTGATGAA | 281  |

|         |                                                             |      |
|---------|-------------------------------------------------------------|------|
| Larissa | GAAACACAACTAATAAAAACAAAGCTTCATTTTATTGTTGATATTTTCCAGGAACAAAT | 2160 |
| 16      | -----                                                       | 0    |
| 10      | GAAACACAACTAATAAAAACAAAGCTTCATTTTATTGTTGATATTTTCCAGGAACAAAT | 377  |
| UFG1    | GAAACACAACTAATAAAAACAAAGCTTCATTTTATTGTTGATATTTTCCAGGAACAAAT | 2160 |
| 3       | GAAACACAACTAATAAAAACAAAGCTTCATTTTATTGTTGATATTTTCCAGGAACAAAT | 341  |
| UF31    | GAAACACAACTAATAAAAACAAAGCTTCATTTTATTGTTGATATTTTCCAGGAACAAAT | 2160 |
| UF33    | GAAACACAACTAATAAAAACAAAGCTTCATTTTATTGTTGATATTTTCCAGGAACAAAT | 2160 |
| PG14T   | GAAACACAACTAATAAAAACAAAGCTTCATTTTATTGTTGATATTTTCCAGGAACAAAT | 2160 |
| 23      | GAAACACAACTAATAAAAACAAAGCTTCATTTTATTGTTGATATTTTCCAGGAACAAAT | 340  |
| UFG4    | GAAACACAACTAATAAAAACAAAGCTTCATTTTATTGTTGATATTTTCCAGGAACAAAT | 2160 |
| 22      | GAAACACAACTAATAAAAACAAAGCTTCATTTTATTGTTGATATTTTCCAGGAACAAAT | 384  |
| 13      | GAAACACAACTAATAAAAACAAAGCTTCATTTTATTGTTGATATTTTCCAGGAACAAAT | 341  |
| 19      | GAAACACAACTAATAAAAACAAAGCTTCATTTTATTGTTGATATTTTCCAGGAACAAAT | 340  |
| 5       | GAAACACAACTAATAAAAACAAAGCTTCATTTTATTGTTGATATTTTCCAGGAACAAAT | 340  |
| 6       | GAAACACAACTAATAAAAACAAAGCTTCATTTTATTGTTGATATTTTCCAGGAACAAAT | 341  |

|         |                                                              |      |
|---------|--------------------------------------------------------------|------|
| Larissa | ACTGGTGTTCCACATTTATCATCGGGTAATCCATGATTCTATATAGGTGATCAAGGTTAT | 2220 |
| 16      | -----TTAT                                                    | 4    |
| 10      | ACTGGTGTTCCACATTTATCATCGGGTAACCCATGATTCTATATAGGTGATCAAGGTTAT | 437  |
| UFG1    | ACTGGTGTTCCACATTTATCATCAGGTAACCCATGATTCTATATAGGTGATCAAGGTTAT | 2220 |
| 3       | ACTGGTGTTCCACATTTATCATCGGGTAACCCATGATTCTATATAGGTGATCAAGGTTAT | 401  |
| UF31    | ACTGGTGTTCCACATTTATCATCGGGTAACCCATGATTCTATATAGGTGATCAAGGTTAT | 2220 |
| UF33    | ACTGGTGTTCCACATTTATCATCGGGTAACCCATGATTCTATATAGGTGATCAAGGTTAT | 2220 |
| PG14T   | ACTGGTGTTCCACATTTATCATCGGGTAACCCATGATTCTATATAGGTGATCAAGGTTAT | 2220 |
| 23      | ACTGGTGTTCCACATTTATCATCGGGTAACCCATGATTCTATATAGGTGATCAAGGTTAT | 400  |
| UFG4    | ACTGGTGTTCCACATTTATCATCGGGTAACCCATGATTCTATATAGGTGATCAAGGTTAT | 2220 |
| 22      | ACTGGTGTTCCACATTTATCATCGGGTAACCCATGATTCTATATAGGTGATCAAGGTTAT | 444  |
| 13      | ACTGGTGTTCCACATTTATCATCGGGTAACCCATGATTCTATATAGGTGATCAAGGTTAT | 401  |
| 19      | ACTGGTGTTCCACATTTATCATCGGGTAACCCATGATTCTATATAGGTGATCAAGGTTAT | 400  |
| 5       | ACTGGTGTTCCACATTTATCATCGGGTAACCCATGATTCTATATAGGTGATCAAGGTTAT | 400  |
| 6       | ACTGGTGTTCCACATTTATCATCGGGTAACCCATGATTCTATATAGGTGATCAAGGTTAT | 401  |

\*\*\*\*

|         |                                                             |      |
|---------|-------------------------------------------------------------|------|
| Larissa | CTAAAAATGTGGACAAAATTAATAACAGAAATAATTTTGATTCTAGATCATCAGTATTA | 2280 |
| 16      | CTAAAAATGTGGACAAAATTAATAACAGAAATAATTTTGATTGTAGATCATCAGTATTA | 64   |
| 10      | CTAAAAATGTGGACAAAATTAATAACAGAAATAATTTTGATTCCAGATCATCAGTATTA | 497  |
| UFG1    | CTAAAAATGTGGACAAAATTAATAACAGAAATAATTTTGATTCTAGATCATCAGTATTA | 2280 |
| 3       | CTAAAAATGTGGACAAAATTAATAACAGAAATAATTTTGATTCTAGATCATCAGTATTA | 461  |
| UF31    | CTAAAAATGTGGACAAAATTAATAACAGAAATAATTTTGATTCTAGATCATCAGTATTA | 2280 |
| UF33    | CTAAAAATGTGGACAAAATTAATAACAGAAATAATTTTGATTCTAGATCATCAGTATTA | 2280 |
| PG14T   | CTAAAAATGTGGACAAAATTAATAACAGAAATAATTTTGATTCTAGATCATCAGTATTA | 2280 |
| 23      | CTAAAAATGTGGACAAAATTAATAACAGAAATAATTTTGATTCTAGATCATCAGTATTA | 460  |
| UFG4    | CTAAAAATGTGGACAAAATTAATAACAGAAATAATTTTGATTCTAGATCATCAGTATTA | 2280 |
| 22      | CTAAAAATGTGGACAAAATTAATAACAGAAATAATTTTGATTCTAGATCATCAGTATTA | 504  |
| 13      | CTAAAAATGTGGACAAAATTAATAACAGAAATAATTTTGATTCTAGATCATCAGTATTA | 461  |
| 19      | CTAAAAATGTGGACAAAATTAATAACAGAAATAATTTTGATTCTAGATCATCAGTATTA | 460  |
| 5       | CTAAAAATGTGGACAAAATTAATAACAGAAATAATTTTGATTCTAGATCATCAGTATTA | 460  |
| 6       | CTAAAAATGTGGACAAAATTAATAACAGAAATAATTTTGATTCTAGATCATCAGTATTA | 461  |

\*\*\*\*\*

|         |                                                              |      |
|---------|--------------------------------------------------------------|------|
| Larissa | AAGCGTGTAGAAGGAAGAGGAAATTGATTTAGAAGATATATACTACCAGCTGGTGTTTCA | 2340 |
| 16      | AAGCGTATAGAAGGAAGAGGAAATTGATTTAGAAGATATATACTACCAGCTGGTGTTTCA | 124  |
| 10      | AAGCGTGTAGAAGGAAGAGGAAATTGATTTAGAAGATATATACTACCAGCTGGTGTTTCA | 557  |
| UFG1    | AAGCGTGTAGAAGGAAGAGGAAATTGATTTAGAAGATATATACTACCAGCTGGTGTTTCA | 2340 |
| 3       | AAGCGTGTAGAAGGAAGAGGAAATTGATTTAGAAGATATATACTACCAGCTGGTGTTTCA | 521  |
| UF31    | AAGCGTGTAGAAGGAAGAGGAAATTGATTTAGAAGATATATACTACCAGCTGGTGTTTCA | 2340 |
| UF33    | AAGCGTGTAGAAGGAAGAGGAAATTGATTTAGAAGATATATACTACCAGCTGGTGTTTCA | 2340 |
| PG14T   | AAGCGTGTAGAAGGAAGAGGAAATTGATTTAGAAGATATATACTACCAGCTGGTGTTTCA | 2340 |
| 23      | AAGCGTGTAGAAGGAAGAGGAAATTGATTTAGAAGATATATACTACCAGCTGGTGTTTCA | 520  |
| UFG4    | AAGCGTGTAGAAGGAAGAGGAAATTGATTTAGAAGATATATACTACCAGCTGGTGTTTCA | 2340 |
| 22      | AAGCGTGTAGAAGGAAGAGGAAATTGATTTAGAAGATATATACTACCAGCTGGTGTTTCA | 564  |
| 13      | AAGCGTGTAGAAGGAAGAGGAAATTGATTTAGAAGATATATACTACCAGCTGGTGTTTCA | 521  |
| 19      | AAGCGTGTAGAAGGAAGAGGAAATTGATTTAGAAGATATATACTACCAGCTGGTGTTTCA | 520  |
| 5       | AAGCGTGTAGAAGGAAGAGGAAATTGATTTAGAAGATATATACTACCAGCTGGTGTTTCA | 520  |
| 6       | AAGCGTGTAGAAGGAAGAGGAAATTGATTTAGAAGATATATACTACCAGCTGGTGTTTCA | 521  |

\*\*\*\*\*

|         |                                                               |      |
|---------|---------------------------------------------------------------|------|
| Larissa | TTTAACAATAATTTTACAGCAAGCACACAAC TAGAAGAAACAAATACATATGTGGATATG | 2400 |
| 16      | TTTAACAATAATTTTACAGCAAGCACACAAC TAGAAGAAACAAATACATATGTGGATATG | 184  |
| 10      | TTTAACAATAATTTTACAGCAAGCACACAAC TAGAAGAAACAAATACATATGTGGATATG | 617  |
| UFG1    | TTTAACAATAATTTTACAGCAAGCACACAAC TAGAAGAAACAAATACATATGTGGATATG | 2400 |
| 3       | TTTAACAATAATTTTACAGCAAGCACACAAC TAGAAGAAACAAATACATATGTGGATATG | 581  |
| UF31    | TTTAACAATAATTTTACAGCAAGCACACAAC TAGAAGAAACAAATACATATGTGGATATG | 2400 |
| UF33    | TTTAACAATAATTTTACAGCAAGCACACAAC TAGAAGAAACAAATACATATGTGGATATG | 2400 |
| PG14T   | TTTAACAATAATTTTACAGCAAGCACACAAC TAGAAGAAACAAATACATATGTGGATATG | 2400 |
| 23      | TTTAACAATAATTTTACAGCAAGCACACAAC TAGAAGAAACAAATACATATGTGGATATG | 580  |
| UFG4    | TTTAACAATAATTTTACAGCAAGCACACAAC TAGAAGAAACAAATACATATGTGGATATG | 2400 |
| 22      | TTTAACAATAATTTTACAGCAAGCACACAAC TAGAAGAAACAAATACATATGTGGATATG | 624  |
| 13      | TTTAACAATAATTTTACAGCAAGCACACAAC TAGAAGAAACAAATACATATGTGGATATG | 581  |
| 19      | TTTAACAATAATTTTACAGCAAGCACACAAC TAGAAGAAACAAATACATATGTGGATATG | 580  |
| 5       | TTTAACAATAATTTTACAGCAAGCACACAAC TAGAAGAAACAAATACATATGTGGATATG | 580  |
| 6       | TTTAACAATAATTTTACAGCAAGCACACAAC TAGAAGAAACAAATACATATGTGGATATG | 581  |
|         | *****                                                         |      |

|         |                                                              |      |
|---------|--------------------------------------------------------------|------|
| Larissa | AATTATCATCAAGATACAAAATCAATTTCTGGTAGAGTATATGAAAATGTCATGGAATCA | 2460 |
| 16      | AATTATCATCAAGATACAAAATCAATTTCTGGTAGAGTATATGAAAATGTCATGGAATCA | 244  |
| 10      | AATTATCATCAAGATACAAAATCAATTTCTGGTAGAGTATATGAAAATGTCATGGAATCA | 677  |
| UFG1    | AATTATCATCAAGATACAAAATCAATTTCTGGTAGAGTATATGAAAATGTCATGGAATCA | 2460 |
| 3       | AATTATCATCAAGATACAAAATCAATTTCTGGTAGAGTATATGAAAATGTCATGGAATCA | 641  |
| UF31    | AATTATCATCAAGATACAAAATCAATTTCTGGTAGAGTATATGAAAATGTCATGGAATCA | 2460 |
| UF33    | AATTATCATCAAGATACAAAATCAATTTCTGGTAGAGTATATGAAAATGTCATGGAATCA | 2460 |
| PG14T   | AATTATCATCAAGATACAAAATCAATTTCTGGTAGAGTATATGAAAATGTCATGGAATCA | 2460 |
| 23      | AATTATCATCAAGATACAAAATCAATTTCTGGTAGAGTATATGAAAATGTCATGGAATCA | 640  |
| UFG4    | AATTATCATCAAGATACAAAATCAATTTCTGGTAGAGTATATGAAAATGTCATGGAATCA | 2460 |
| 22      | AATTATCATCAAGATACAAAATCAATTTCTGGTAGAGTATATGAAAATGTCATGGAATCA | 684  |
| 13      | AATTATCATCAAGATACAAAATCAATTTCTGGTAGAGTATATGAAAATGTCATGGAATCA | 641  |
| 19      | AATTATCATCAAGATACAAAATCAATTTCTGGTAGAGTATATGAAAATGTCATGGAATCA | 640  |
| 5       | AATTATCATCAAGATACAAAATCAATTTCTGGTAGAGTATATGAAAATGTCATGGAATCA | 640  |
| 6       | AATTATCATCAAGATACAAAATCAATTTCTGGTAGAGTATATGAAAATGTCATGGAATCA | 641  |
|         | *****                                                        |      |

|         |                                                             |      |
|---------|-------------------------------------------------------------|------|
| Larissa | GATTTTGATGATCCAGCAGCATTAGATTCTAAAAAACTGAGCACAGTGTTTTTGATGAA | 2520 |
| 16      | GATTTTGATGATCCAGCAGCATTAGATTCTAAAAAACTGAGCACAGTGTTTTTGATGAA | 304  |
| 10      | GATTTTGATGATCCAGCAGCATTAGATTCTAAAAAACTGAGCACAGTGTTTTTGATGAA | 737  |
| UFG1    | GATTTTGATGATCCAGCAGCATTAGATTCTAAAAAACTGAGCACAGTGTTTTTGATGAA | 2520 |
| 3       | GATTTTGATGATCCAGCAGCATTAGATTCTAAAAAACTGAGCACAGTGTTTTTGATGAA | 701  |
| UF31    | GATTTTGATGATCCAGCAGCATTAGATTCTAAAAAACTGAGCACAGTGTTTTTGATGAA | 2520 |
| UF33    | GATTTTGATGATCCAGCAGCATTAGATTCTAAAAAACTGAGCACAGTGTTTTTGATGAA | 2520 |
| PG14T   | GATTTTGATGATCCAATGGCATTAGATTCTAAAAAACTGAGCACAGTGTTTTTGATGAA | 2520 |
| 23      | GATTTTGATGATCCAGCAGCATTAGATTCTAAAAAACTGAGCACAGTGTTTTTGATGAA | 700  |
| UFG4    | GATTTTGATGATCCAGCAGCATTAGATTCTAAAAAACTGAGCACAGTGTTTTTGATGAA | 2520 |
| 22      | GATTTTGATGATCCAGCAGCATTAGATTCTAAAAAACTGAGCACAGTGTTTTTGATGAA | 744  |
| 13      | GATTTTGATGATCCAGCAGCATTAGATTCTAAAAAACTGAGCACAGTGTTTTTGATGAA | 701  |
| 19      | GATTTTGATGATCCAGCAGCATTAGATTCTAAAAAACTGAGCACAGTGTTTTTGATGAA | 700  |
| 5       | GATTTTGATGATCCAGCAGCATTAGATTCTAAAAAACTGAGCACAGTGTTTTTGATGAA | 700  |
| 6       | GATTTTGATGATCCAGCAGCATTAGATTCTAAAAAACTGAGCACAGTGTTTTTGATGAA | 701  |
|         | *****                                                       |      |

|         |                                                             |      |
|---------|-------------------------------------------------------------|------|
| Larissa | CCAAGAAAAGTTACAAACGTAACAATAATACATTTGAACCATTAAGAAATGAGCATGCT | 2580 |
| 16      | CCAAGAAAAGTTACAAACGTAACAATAATACATTTGAACCATTAAGAAATGAGCATGCT | 364  |
| 10      | CCAAGAAAAGTTACAAACGTAACAATAATACATTTGAACCACTAAGAAATGAGCACGCT | 797  |
| UFG1    | CCAAGAAAAGTTACAAACGTAACAATAATACATTTGAACCATTAAGAAATGAGCATGCT | 2580 |
| 3       | CCAAGAAAAGTTACAAACGTAACAATAATACATTTGAACCATTAAGAAATGAGCATGCT | 761  |
| UF31    | CCAAGAAAAGTTACAAACGTAACAATAATACATTTGAACCATTAAGAAATGAGCATGCT | 2580 |
| UF33    | CCAAGAAAAGTTACAAACGTAACAATAATACATTTGAACCATTAAGAAATGAGCATGCT | 2580 |
| PG14T   | CCAAGAAAAGTTACAAACGTAACAATAATACATTTGAACCATTAAGAAATGAGCATGCT | 2580 |
| 23      | CCAAGAAAAGTTACAAACGTAACAATAATACATTTGAACCATTAAGAAATGAGCACGCT | 760  |
| UFG4    | CCAAGAAAAGTTACAAACGTAACAATAATACATTTGAACCATTAAGAAATGAGCATGCT | 2580 |
| 22      | CCAAGAAAAGTTACAAACGTAACAATAATACATTTGAACCATTAAGAAATGAGCATGCT | 804  |
| 13      | CCAAGAAAAGTTACAAACGTAACAATAATACATTTGAACCATTAAGAAATGAGCATGCT | 761  |
| 19      | CCAAGAAAAGTTACAAACGTAACAATAATACATTTGAACCATTAAGAAATGAGCATGCT | 760  |
| 5       | CCAAGAAAAGTTACAAACGTAACAATAATACATTTGAACCATTAAGAAATGAGCATGCT | 760  |
| 6       | CCAAGAAAAGTTACAAACGTAACAATAATACATTTGAACCATTAAGAAATGAGCATGCT | 761  |

\*\*\*\*\* \*\*\*\*\* \*\*

Asp box motif

|         |                                                              |      |
|---------|--------------------------------------------------------------|------|
| Larissa | GTATATGCCTTAGCCATAAATAGTCACCTTGCGACGCTAGAAAGTTATGATGAAGGTAGA | 2640 |
| 16      | GTATATGCCTTGCCATAAATAGTCACCTTGCAACGCTAGAAAGTTATGATGAAGGTAGA  | 424  |
| 10      | GTATATGCCTTGCCATAAATAGCCACCTTGCAACGCTAGAAAGTTATGATGAAGGTAGA  | 857  |
| UFG1    | GTATATGCCTTAGCCATAAATAGCCACCTTGCGACGCTAGAAAGTTATGATGAAGGTAGA | 2640 |
| 3       | GTATATGCCTTGCCATAAATAGTCACCTTGCAACGCTAGAAAGTTATGATGAAGGTAGA  | 821  |
| UF31    | GTATATGCCTTAGCCATAAATAGCCACCTTGCGACGCTAGAAAGTTATGATGAAGGTAGA | 2640 |
| UF33    | GTATATGCCTTAGCCATAAATAGCCACCTTGCGACGCTAGAAAGTTATGATGAAGGTAGA | 2640 |
| PG14T   | GTATATGCCTTAGCCATAAATAGCCACCTTGCAACACTAGAAAGTTATGATGAAGGTAGA | 2640 |
| 23      | GTATATGCCTTGCCATAAATAGTCACCTTGCAACGCTAGAAAGTTATGATGAAGGTAGA  | 820  |
| UFG4    | GTATATGCCTTGCCATAAATAGTCACCTTGCAACGCTAGAAAGTTATGATGAAGGTAGA  | 2640 |
| 22      | GTATATGCCTTGCCATAAATAGTCACCTTGCAACGCTAGAAAGTTATGATGAAGGTAGA  | 864  |
| 13      | GTATATGCCTTGCCATAAATAGTCACCTTGCAACGCTAGAAAGTTATGATGAAGGTAGA  | 821  |
| 19      | GTATATGCCTTGCCATAAATAGTCACCTTGCAACGCTAGAAAGTTATGATGAAGGTAGA  | 820  |
| 5       | GTATATGCCTTGCCATAAATAGTCACCTTGCAACGCTAGAAAGTTATGATGAAGGTAGA  | 820  |
| 6       | GTATATGCCTTGCCATAAATAGTCACCTTGCAACGCTAGAAAGTTATGATGAAGGTAGA  | 821  |

\*\*\*\*\* \*\*\*\*\* \*\* \*\*\*\*\*

|         |                                                             |      |
|---------|-------------------------------------------------------------|------|
| Larissa | ACATGAACTAACTTACAATGGATCGATGAAAACTATCAAGACATAGAAATAATCATAAG | 2700 |
| 16      | ACATGAACTAACTTAAAATGGATTGATGAAAACTCTCAAGAGATAG-----         | 471  |
| 10      | ACATGAACTAACTTACAATGAATCGATGAAAACTCTCAAGACATAG-----         | 904  |
| UFG1    | ACATGAACTAACTTACAATGGATCGATGAAAACTATCAAGACATAGAAATAATCATAAG | 2700 |
| 3       | ACATGAACTAACTTACAATGGATTGATGAAAACTCTCAAGACAT-----           | 866  |
| UF31    | ACATGAACTAACTTACAATGGATCGATGAAAACTATCAAAACATAGAAATAATCATAAG | 2700 |
| UF33    | ACATGAACTAACTTACAATGGATCGATGAAAACTATCAAAACATAGAAATAATCATAAG | 2700 |
| PG14T   | ACATGAACTAACTTACAATGGATTGATGAAAACTTTCAAGACATAGAAATAATCATAAG | 2700 |
| 23      | ACATGAACTAACTTACAATGGATTGATGAAAACTTTCAAGAGATAG-----         | 867  |
| UFG4    | ACATGAACTAACTTACAATGGATCGATGAAAACTCTCAAGAGATAGAAATAATCATAAG | 2700 |
| 22      | ACATGAACTAACTTACAATGGATCGATGAAAACTCTCAAGAGATAGAAATAATCATAAG | 924  |
| 13      | ACATGAACTAACTTACAATGGATCGATGAAAACTCTCAAGACAT-----           | 866  |
| 19      | ACATGAACTAACTTACAATGGATCGATGAAAACTCTCAAGAC-----             | 863  |
| 5       | ACATGAACTAACTTACAATGGATTGATGAAAACTTTCAAGACATAG-----         | 867  |
| 6       | ACATGAACTAACTTACAATGGATTGACGAAAACTTTCAAGACATAGAAATAATC----- | 876  |

\*\*\*\*\* \*\*\*\*\* \*\* \* \*\*\*\*\* \*\*\*\*\* \*

|         |                                                               |      |
|---------|---------------------------------------------------------------|------|
| Larissa | TTTGTAGGTACTGGGGTAGGAAACGGAATACAACCTAAACACCAAGCAAATGCTTCTATA  | 2760 |
| 16      | -----                                                         | 471  |
| 10      | -----                                                         | 904  |
| UFG1    | TTTGTAGGTACTGGGGTAGGAAACGGAATACAACCTAAACACCAAAACAAATGCTTCTATA | 2760 |
| 3       | -----                                                         | 866  |
| UF31    | TTTGTAGGTACTGGGGTAGGAAACGGAATACAACCTAAACACCAAGCAAATGCTTCTATA  | 2760 |
| UF33    | TTTGTAGGTACTGGGGTAGGAAACGGAATACAACCTAAACACCAAAACAAATGCTTCTATA | 2760 |
| PG14T   | TTTGTAGGTACTGGGGTAGGAAACGGAATACAACCTAAACACCAAGCAAATGCTTCTATA  | 2760 |
| 23      | -----                                                         | 867  |
| UFG4    | TTTGTAGGTACTGGGGTAGGAAACGGAATACAACCTAAACACCAAGCAAATGCTTCTATA  | 2760 |
| 22      | TTTGTAGGTACTGGGGTAGGAAACGGAATACAA-----                        | 957  |
| 13      | -----                                                         | 866  |
| 19      | -----                                                         | 863  |
| 5       | -----                                                         | 867  |
| 6       | -----                                                         | 876  |

|         |                                                              |      |
|---------|--------------------------------------------------------------|------|
| Larissa | AATGGTAGAGTAATTATACCTATGTACTCTATGAATAACAATGATCATTATATGTTTTTC | 2820 |
| 16      | -----                                                        | 471  |
| 10      | -----                                                        | 904  |
| UFG1    | AATGGTAGAGTAATTATACCTATGTACTCTATGAATAACAATGATCACCATATGTTTTTC | 2820 |
| 3       | -----                                                        | 866  |
| UF31    | AATGGTAGAGTAATTATACCTATGTACTCTATGAATAACAATGATCATTATATGTTTTTC | 2820 |
| UF33    | AATGGTAGAGTAATTATACCTATGTACTCTATGAATAACAATGATCATTATATGTTTTTC | 2820 |
| PG14T   | AATGGTAGAGTAATTATACCTATGTACTCTATGAATAACAATGATCATTATATGTTTTTC | 2820 |
| 23      | -----                                                        | 867  |
| UFG4    | AATGGTAGAGTAATTATACCTATGTACTCTATGAATAACAATGATCATTATATGTTTTTC | 2820 |
| 22      | -----                                                        | 957  |
| 13      | -----                                                        | 866  |
| 19      | -----                                                        | 863  |
| 5       | -----                                                        | 867  |
| 6       | -----                                                        | 876  |

|         |                                                               |      |
|---------|---------------------------------------------------------------|------|
| Larissa | ATATATAGCGATGATAAAGGAAAAACATGAACCAAATACACACCTAATGGATTTAAAACC  | 2880 |
| 16      | -----                                                         | 471  |
| 10      | -----                                                         | 904  |
| UFG1    | ATATACAGCGATGATAAAGGGAAAAACATGAACCAAATACACGCCTACCGGATTTAAAGCC | 2880 |
| 3       | -----                                                         | 866  |
| UF31    | ATATATAGCGATGATAAAGGAAAAACATGAACCAAATACACACCTACTGGATTTAAAACC  | 2880 |
| UF33    | ATATATAGCGATGATAAAGGAAAAATATGAACCAAATACACACCTACTGGATTTAAAAC   | 2880 |
| PG14T   | ATATATAGCGATGATAAAGGAAAAACATGAACCAAATACACACCTAATGGATTTAAAACC  | 2880 |
| 23      | -----                                                         | 867  |
| UFG4    | ATATATAGCGATGATAAAGGAAAAACATGAATCAAATACACACCTACTGGATTTAAAAC   | 2880 |
| 22      | -----                                                         | 957  |
| 13      | -----                                                         | 866  |
| 19      | -----                                                         | 863  |
| 5       | -----                                                         | 867  |
| 6       | -----                                                         | 876  |



|         |                                                             |      |
|---------|-------------------------------------------------------------|------|
| Larissa | AACCTATCTGAATCATCTTTTGTGAAACAGAAGACGGTACTTTATATTGATTCGCAAGA | 2940 |
| 16      | -----                                                       | 471  |
| 10      | -----                                                       | 904  |
| UFG1    | AACCTATCTGAATCATCTTTTGTGAAACAGAAGACGGTACTTTATATTGATTCGCAAGA | 2940 |
| 3       | -----                                                       | 866  |
| UF31    | AACCTATCTGAATCATCTTTTGTGAAACAGAAGACGGTACTTTATATTGATTCGCAAGA | 2940 |
| UF33    | AACCTATCTGAATCATCTTTTGTGAAACAGAAGACGGTACTTTATATTGATTCGCAAGA | 2940 |
| PG14T   | AACCTATCTGAATCATCTTTTGTGAAACAGAAGACGGTACTTTATATTGATTCGCAAGA | 2940 |
| 23      | -----                                                       | 867  |
| UFG4    | AACCTATCTGAATCATCTTTTGTGAAACAGAAGACGGTACTTTATATTGATTCGCAAGA | 2940 |
| 22      | -----                                                       | 957  |
| 13      | -----                                                       | 866  |
| 19      | -----                                                       | 863  |
| 5       | -----                                                       | 867  |
| 6       | -----                                                       | 876  |

|         |                                                               |      |
|---------|---------------------------------------------------------------|------|
| Larissa | CATACAGGTAGTTTTGGACAAAATACATTTAGAACATTTATTTCAAAAAGTACAGATGGT  | 3000 |
| 16      | -----                                                         | 471  |
| 10      | -----                                                         | 904  |
| UFG1    | CATACAGGTAGTTTTGGACAAAATACATTTAGAACATTTATTTCAAAAAGTACAGATGGT  | 3000 |
| 3       | -----                                                         | 866  |
| UF31    | CATACAGGTAGTTTTGGACAAAATACATTTAGAACATTTATTTCAAAAAGTACAGATGGT  | 3000 |
| UF33    | CATACAGGCCGTTTTGGGCAAAAATACATTTAGAACATTTATTTCAAAAAGTACAGATGGT | 3000 |
| PG14T   | CATACAGGTAGTTTTGGACAAAATACATTTAGAACATTTATTTCAAAAAGTACAGATGGT  | 3000 |
| 23      | -----                                                         | 867  |
| UFG4    | CATACAGGCCGTTTTGGGCAAAAATACATTTAGAACATTTATTTCAAAAAGTACAGATGGT | 3000 |
| 22      | -----                                                         | 957  |
| 13      | -----                                                         | 866  |
| 19      | -----                                                         | 863  |
| 5       | -----                                                         | 867  |
| 6       | -----                                                         | 876  |

|         |                                                              |      |
|---------|--------------------------------------------------------------|------|
| Larissa | GGTATGACTTGAAGCAGTCCTGATAATGACACATCTAGAAAAGGTAAAGATATGCAAATT | 3060 |
| 16      | -----                                                        | 471  |
| 10      | -----                                                        | 904  |
| UFG1    | GGTATGACTTGAAGCAGTCCTGATAATGACGCATCTAGAAAAGGTAAAGATATGCAAATT | 3060 |
| 3       | -----                                                        | 866  |
| UF31    | GGTATGACTTGAAGCAGTCCTGATAATGACGCATCTAGAAAAGGTAAAGATATGCAAATT | 3060 |
| UF33    | GGTATGACTTGAAGCAGTCCTGATAATGACGCATCTAGAAAAGGTAAAGATATGCAAATT | 3060 |
| PG14T   | GGTATGACTTGAAGCAGTCCTGATAATGACACATCTAGAAAAGGTAAAGATATGCAAATT | 3060 |
| 23      | -----                                                        | 867  |
| UFG4    | GGTATGACTTGAAGCAGTCCTGATAATGACGCATCTAGAAAAGGTAAAGATATGCAAATT | 3060 |
| 22      | -----                                                        | 957  |
| 13      | -----                                                        | 866  |
| 19      | -----                                                        | 863  |
| 5       | -----                                                        | 867  |
| 6       | -----                                                        | 876  |

|         |                                                              |      |
|---------|--------------------------------------------------------------|------|
| Larissa | GGTAATCCTTACGATGCAAATATTTTTTCAGGTATTGATCACTTTAGATGGAAAAATAAA | 3120 |
| 16      | -----                                                        | 471  |
| 10      | -----                                                        | 904  |
| UFG1    | GGTAATCCTTACGATGCAAATATTTTTTCAGGTATTGATCACTTTAGATGGAAAAATAAA | 3120 |
| 3       | -----                                                        | 866  |
| UF31    | GGCAATCCTTACGATGGAAATATTTTTTCAGGAATCTCATATTTTAAATGAAAAATAAA  | 3120 |
| UF33    | GGCAATCCTTACGATGCAAATATTTTTTCAGGTATTGATCACTTTAGATGGAAAAATAAA | 3120 |
| PG14T   | GGTAATCCTTACGATGCAAATATTTTTTCAGGTATTGATCACTTTAGATGGAAAAATAAA | 3120 |
| 23      | -----                                                        | 867  |
| UFG4    | GGCAATCCTTACGATGCAAATATTTTTTCAGGTATTGATCACTTTAGATGGAAAAATAAA | 3120 |
| 22      | -----                                                        | 957  |
| 13      | -----                                                        | 866  |
| 19      | -----                                                        | 863  |
| 5       | -----                                                        | 867  |
| 6       | -----                                                        | 876  |

|         |                                                             |      |
|---------|-------------------------------------------------------------|------|
| Larissa | GATTATTTTATTTTCTCTCTTTCAAATCTGCAGTCAGAAGAAATGGTTATTTATTTATA | 3180 |
| 16      | -----                                                       | 471  |
| 10      | -----                                                       | 904  |
| UFG1    | GATTATTTTATTTTCTCTCTTTCAAATCTGTCGTTAGAAGAAATGGTTCTTTATTTATA | 3180 |
| 3       | -----                                                       | 866  |
| UF31    | GATTATTTTATTTTCTCTCTTTCAAATCTGTAGTTAGAAGAAATGGTTCTTTATTTATA | 3180 |
| UF33    | GATTATTTTATTTTCTCTCTTTCAAATCTGTAGTTAGAAGAAATGGTTCTTTATTTATA | 3180 |
| PG14T   | GATTATTTTATTTTCTCTCTTTCAAATCTGCAGTCAGAAGAAATGGTTATTTATTTATA | 3180 |
| 23      | -----                                                       | 867  |
| UFG4    | GATTATTTTATTTTCTCTCTTTCAAATCTGCAGTCAGAAGAAATGGTTCTTTATTTATG | 3180 |
| 22      | -----                                                       | 957  |
| 13      | -----                                                       | 866  |
| 19      | -----                                                       | 863  |
| 5       | -----                                                       | 867  |
| 6       | -----                                                       | 876  |

|         |                                                              |      |
|---------|--------------------------------------------------------------|------|
| Larissa | GCAGATGCAACATTCGAGAATATTGTTGAACTATTTAGGTATGATGATAATCAAAGAGAG | 3240 |
| 16      | -----                                                        | 471  |
| 10      | -----                                                        | 904  |
| UFG1    | GCAGATGCAACATTTGAGAATATTGTTGAACTATTTAGGTATGATGATAATCAAAGAGAG | 3240 |
| 3       | -----                                                        | 866  |
| UF31    | GCAGATGCAACATTTGAGAATATTGTTGAACTATTTAGGTATGATGATAATCAAAGAGAG | 3240 |
| UF33    | GCAGATGCAACATTTGAGAATATTATTGAACTATTTAGGTATGATGATAATCAAAGAGAG | 3240 |
| PG14T   | GCAGATGCAACATTCGAGAATATTGTTGAACTATTTAGGTATGATGATAATCAAAGAGAG | 3240 |
| 23      | -----                                                        | 867  |
| UFG4    | GCAGATGCAACATTTGAGAATATTGTTGAACTATTTAGGTATGATGATAATCAAAGAGAG | 3240 |
| 22      | -----                                                        | 957  |
| 13      | -----                                                        | 866  |
| 19      | -----                                                        | 863  |
| 5       | -----                                                        | 867  |
| 6       | -----                                                        | 876  |

|         |                                                               |      |
|---------|---------------------------------------------------------------|------|
| Larissa | CATTTTGCTTATAGCTATGCGCTTGTTACTAATAAAACAGAAAACATATATAGATTTTATT | 3300 |
| 16      | -----                                                         | 471  |
| 10      | -----                                                         | 904  |
| UFG1    | CATTTTGCTTATAGCTATGCACTTGTTACTAATAAAACAGAAAACATATATAGATTTTATT | 3300 |
| 3       | -----                                                         | 866  |
| UF31    | CATTTTGCTTATAGCTATGCACTTGTTACTAATAAAACAGAAAACATATATAGATTTTATT | 3300 |
| UF33    | CATTTTGTTTATAGCTATGCACTTGTTACTAATAAAACAGAAAACATATATAGATTTTATT | 3300 |
| PG14T   | CATTTTGCTTATAGCTATGCGCTTGTTACTAATAAAACAGAAAACATATATAGATTTTATT | 3300 |
| 23      | -----                                                         | 867  |
| UFG4    | CATTTTGCTTATAGCTATGCACTTGTTACTAATAAAACAGAAAACATATATAGATTTTATT | 3300 |
| 22      | -----                                                         | 957  |
| 13      | -----                                                         | 866  |
| 19      | -----                                                         | 863  |
| 5       | -----                                                         | 867  |
| 6       | -----                                                         | 876  |

|         |                                                              |      |
|---------|--------------------------------------------------------------|------|
| Larissa | AGTATTTATGAAGCTTCTGAAAGGTTTAAAATTATAGATGGTGGATTTGATAACTCTAGA | 3360 |
| 16      | -----                                                        | 471  |
| 10      | -----                                                        | 904  |
| UFG1    | AGTATTTATGAAGCTTCTGAAAGGTTTAAAATTTTAGATGGCGGCTTTGATAACTCTAGA | 3360 |
| 3       | -----                                                        | 866  |
| UF31    | AGTATTTATGAAGCTTCTGAAAGGTTTAAAATTATAGATGGCGGATTTGATAATTCTAGA | 3360 |
| UF33    | AGTATTTATGAAGCTTCTGAAAGGTTTAAAATTATAGATGGCGGATTTGATAATTCTAGA | 3360 |
| PG14T   | AGTATTTATGAAGCTTCTGAAAGGTTTAAAATTATAGATGGTGGATTTGATAACTCTAGA | 3360 |
| 23      | -----                                                        | 867  |
| UFG4    | AGTATTTATGAAGCTTCTGAAAGGTTTAAAATTTTAGATGGCGGCTTTGATAACTCTAGA | 3360 |
| 22      | -----                                                        | 957  |
| 13      | -----                                                        | 866  |
| 19      | -----                                                        | 863  |
| 5       | -----                                                        | 867  |
| 6       | -----                                                        | 876  |

|         |                                                        |      |
|---------|--------------------------------------------------------|------|
| Larissa | CCAAAAGGTGGAGAAATCCAATTAGACAAATTTAGATTATGAATTAAAGATTAA | 3414 |
| 16      | -----                                                  | 471  |
| 10      | -----                                                  | 904  |
| UFG1    | CCACAAGGTGGAGAAATTCAGTTAGATAAATTTAGATTATGAATTAAAGATTAA | 3414 |
| 3       | -----                                                  | 866  |
| UF31    | CCACAAGGTGGAGAAATTCAGTTAGATAAATTTAGATTATGAATTAAAGATTAA | 3414 |
| UF33    | CCACAAGGTGGAGAAATTCAGTTAGATAAATTTAGATTATGAATTAAAGATTAA | 3414 |
| PG14T   | CCAAAAGGTGGAGAAATCCAATTAGACAAATTTAGATTATGAATTAAAGATTAA | 3414 |
| 23      | -----                                                  | 867  |
| UFG4    | CCACAAGGTGGAGAAATTCAGTTAGATAAATTTAGATTATGAATTAAAGATTAA | 3414 |
| 22      | -----                                                  | 957  |
| 13      | -----                                                  | 866  |
| 19      | -----                                                  | 863  |
| 5       | -----                                                  | 867  |
| 6       | -----                                                  | 876  |

The neuraminidase partial nucleotide sequences are also available in GenBank under accession numbers PP430513 (patient 3), PP430514 (patient 5), PP430515 (patient 6), PP430516 (patient 10), PP430517 (patient 13), PP430518 (patient 16), PP430519 (patient 19), PP430520 (patient 22), PP430521 (patient 23).
