# Supplementary material for: Association of Mycoplasma canis with Fertility Disorders in Dogs: A Case Study Supported by Clinical Examination, PCR, 16S Microbiota Profiling, and Serology
Source: MDPI journal article supplement (doi:10.3390/pathogens13050391), 2024-05-08
Supplement: s1 [file s1]

**Table S3.** Results of 16S microbiota profiling. Results in % represent bacterial species composition of each sample. FD, fertility disorder; CTRL, control.

| Study group                           | FD    |       |       |       |       | CTRL  |       |       |       |       |
|---------------------------------------|-------|-------|-------|-------|-------|-------|-------|-------|-------|-------|
| Patient number                        | 1     | 6     | 8     | 9     | 11    | 16    | 17    | 23    | 42    | 43    |
| Species                               |       |       |       |       |       |       |       |       |       |       |
| <i>Mycoplasma canis</i>               | 0.00  | 2.48  | 0.00  | 0.00  | 0.00  | 10.77 | 0.01  | 0.23  | 0.00  | 0.24  |
| <i>Mycoplasma cynos</i>               | 11.76 | 0.00  | 17.49 | 0.00  | 0.00  | 0.09  | 18.50 | 66.46 | 0.00  | 90.85 |
| <i>Mycoplasma opalescens</i>          | 2.10  | 0.00  | 0.10  | 0.00  | 0.00  | 0.00  | 0.09  | 0.28  | 0.00  | 0.30  |
| <i>Mycoplasma fermentans</i>          | 0.02  | 0.00  | 0.00  | 0.00  | 0.00  | 0.00  | 0.00  | 0.00  | 0.00  | 0.00  |
| <i>Mycoplasma spumans</i>             | 0.00  | 0.00  | 0.00  | 0.00  | 0.00  | 0.00  | 0.00  | 0.38  | 0.00  | 0.00  |
| <i>Mycoplasma arginini</i>            | 0.00  | 0.00  | 0.00  | 0.00  | 0.00  | 0.00  | 0.00  | 0.04  | 0.00  | 0.00  |
| <i>Mycoplasma canadense</i>           | 0.00  | 0.00  | 0.00  | 0.00  | 0.00  | 0.00  | 0.00  | 0.02  | 0.00  | 0.00  |
| <i>Ureaplasma canigenitalium</i>      | 81.37 | 0.00  | 72.39 | 0.00  | 0.23  | 0.00  | 75.90 | 32.47 | 0.00  | 0.00  |
| <i>Haemophilus haemoglobinophilus</i> | 4.19  | 0.00  | 9.51  | 68.77 | 31.84 | 0.44  | 4.88  | 0.00  | 0.0   | 6.62  |
| <i>Haemophilus felis</i>              | 0.00  | 0.00  | 0.00  | 0.36  | 0.00  | 0.00  | 0.07  | 0.00  | 0.00  | 0.00  |
| <i>Haemophilus ducreyi</i>            | 0.01  | 0.00  | 0.00  | 0.00  | 0.01  | 0.00  | 0.00  | 0.00  | 0.00  | 0.00  |
| <i>Streptococcus canis</i>            | 0.00  | 0.00  | 0.00  | 0.00  | 1.64  | 56.36 | 0.00  | 0.00  | 0.00  | 1.07  |
| <i>Streptococcus agalactiae</i>       | 0.00  | 0.00  | 0.00  | 0.00  | 0.00  | 0.54  | 0.00  | 0.00  | 0.00  | 0.00  |
| <i>Streptococcus equi</i>             | 0.00  | 0.00  | 0.00  | 0.00  | 0.31  | 0.48  | 0.00  | 0.00  | 0.29  | 0.00  |
| <i>Streptococcus dysgalactiae</i>     | 0.00  | 0.00  | 0.00  | 0.00  | 0.00  | 1.31  | 0.00  | 0.00  | 0.12  | 0.00  |
| <i>Streptococcus pyogenes</i>         | 0.00  | 0.00  | 0.00  | 0.00  | 0.00  | 1.14  | 0.00  | 0.00  | 0.00  | 0.00  |
| <i>Streptococcus urinalis</i>         | 0.00  | 0.00  | 0.00  | 0.00  | 0.54  | 0.00  | 0.00  | 0.00  | 0.00  | 0.00  |
| <i>Streptococcus castoreus</i>        | 0.00  | 0.00  | 0.00  | 0.00  | 0.00  | 0.41  | 0.00  | 0.00  | 0.00  | 0.00  |
| <i>Streptococcus didelphis</i>        | 0.00  | 0.00  | 0.00  | 0.00  | 0.00  | 0.13  | 0.00  | 0.00  | 0.00  | 0.00  |
| <i>Streptococcus intermedius</i>      | 0.00  | 0.00  | 0.00  | 0.00  | 0.00  | 0.00  | 0.00  | 0.00  | 0.27  | 0.00  |
| <i>Streptococcus caballi</i>          | 0.00  | 0.00  | 0.00  | 0.00  | 0.00  | 0.00  | 0.00  | 0.00  | 0.26  | 0.00  |
| <i>Fusobacterium</i> sp. HMSC073F01   | 0.00  | 0.00  | 0.00  | 0.00  | 0.45  | 0.00  | 0.00  | 0.00  | 0.00  | 0.00  |
| <i>Fusobacterium gonidiaformans</i>   | 0.00  | 0.00  | 0.00  | 0.00  | 0.00  | 0.00  | 0.00  | 0.00  | 0.81  | 0.00  |
| <i>Fusobacterium varium</i>           | 0.00  | 0.00  | 0.00  | 0.00  | 0.38  | 0.00  | 0.00  | 0.00  | 0.00  | 0.00  |
| <i>Fusobacterium necrophorum</i>      | 0.00  | 0.00  | 0.00  | 0.00  | 0.00  | 0.00  | 0.00  | 0.00  | 87.21 | 0.00  |
| <i>Fusobacterium russii</i>           | 0.00  | 0.00  | 0.00  | 0.00  | 0.39  | 0.00  | 0.00  | 0.00  | 0.03  | 0.00  |
| <i>Psychrobacter</i> sp. SHUES1       | 0.00  | 61.09 | 0.00  | 0.00  | 0.00  | 0.00  | 0.00  | 0.00  | 0.00  | 0.00  |
| <i>Psychrobacter</i> sp. G            | 0.00  | 4.19  | 0.00  | 0.00  | 0.00  | 0.00  | 0.00  | 0.00  | 0.00  | 0.00  |
| <i>Psychrobacter cryohalolentis</i>   | 0.00  | 4.18  | 0.00  | 0.00  | 0.00  | 0.00  | 0.00  | 0.00  | 0.00  | 0.00  |
| <i>Psychrobacter</i> sp. 1501(2011)   | 0.00  | 3.80  | 0.00  | 0.00  | 0.00  | 0.00  | 0.00  | 0.00  | 0.00  | 0.00  |
| <i>Psychrobacter</i> sp. P11F6        | 0.00  | 0.92  | 0.00  | 0.00  | 0.00  | 0.00  | 0.00  | 0.00  | 0.00  | 0.00  |
| <i>Psychrobacter alimentarius</i>     | 0.00  | 2.77  | 0.00  | 0.00  | 0.00  | 0.00  | 0.00  | 0.00  | 0.00  | 0.00  |
| <i>Psychrobacter glacincola</i>       | 0.00  | 0.98  | 0.00  | 0.00  | 0.00  | 0.00  | 0.00  | 0.00  | 0.00  | 0.00  |
| <i>Porphyromonas gingivalis</i>       | 0.00  | 0.00  | 0.00  | 0.26  | 1.10  | 0.00  | 0.00  | 0.00  | 0.31  | 0.00  |
| <i>Porphyromonas cangingivalis</i>    | 0.00  | 0.00  | 0.00  | 19.58 | 11.37 | 0.00  | 0.00  | 0.00  | 0.05  | 0.00  |
| <i>Porphyromonas gingivicanis</i>     | 0.00  | 0.00  | 0.00  | 5.08  | 0.43  | 0.00  | 0.00  | 0.00  | 0.09  | 0.00  |
| <i>Porphyromonas crevioricanis</i>    | 0.00  | 0.00  | 0.00  | 0.69  | 0.20  | 0.00  | 0.14  | 0.00  | 0.55  | 0.00  |
| <i>Porphyromonas gulae</i>            | 0.00  | 0.00  | 0.00  | 0.80  | 0.68  | 0.00  | 0.00  | 0.00  | 0.16  | 0.00  |
| <i>Porphyromonas circumdentaria</i>   | 0.00  | 0.00  | 0.00  | 1.09  | 0.18  | 0.00  | 0.00  | 0.00  | 0.19  | 0.00  |
| <i>Bacteroides pyogene</i>            | 0.00  | 0.00  | 0.00  | 0.00  | 24.34 | 0.00  | 0.00  | 0.00  | 0.00  | 0.00  |
| <i>Bacteroides fragilis</i>           | 0.00  | 0.00  | 0.00  | 0.00  | 2.73  | 0.00  | 0.00  | 0.00  | 0.02  | 0.00  |
| <i>Pseudomonas fragi</i>              | 0.00  | 2.09  | 0.00  | 0.00  | 0.00  | 0.00  | 0.00  | 0.00  | 0.00  | 0.00  |
| <i>Staphylococcus equorum</i>         | 0.00  | 0.62  | 0.00  | 0.00  | 0.00  | 0.00  | 0.00  | 0.00  | 0.00  | 0.00  |
| <i>Pasteurella multocida</i>          | 0.00  | 0.00  | 0.00  | 0.18  | 0.00  | 0.00  | 0.00  | 0.00  | 0.00  | 0.00  |
| <i>Escherichia coli</i>               | 0.00  | 0.00  | 0.00  | 0.00  | 1.61  | 3.83  | 0.00  | 0.00  | 0.00  | 0.00  |
| <i>Histophilus somni</i>              | 0.00  | 0.00  | 0.08  | 0.27  | 0.49  | 0.00  | 0.08  | 0.00  | 0.00  | 0.15  |
| <i>Lactobacillus gasseri</i>          | 0.00  | 0.00  | 0.00  | 0.00  | 0.00  | 0.00  | 0.00  | 0.00  | 0.00  | 0.01  |
| <i>Prevotella intermedis</i>          | 0.00  | 0.00  | 0.00  | 0.00  | 0.12  | 0.00  | 0.00  | 0.00  | 0.25  | 0.00  |
| <i>Weissella confusa</i>              | 0.00  | 0.00  | 0.00  | 0.00  | 0.00  | 2.23  | 0.00  | 0.00  | 0.00  | 0.00  |
| <i>Nostoc linckia</i>                 | 0.01  | 0.01  | 0.03  | 0.08  | 0.00  | 0.01  | 0.01  | 0.00  | 0.00  | 0.04  |
| <i>Peptoniphilus indolicus</i>        | 0.00  | 0.00  | 0.00  | 0.00  | 0.27  | 0.00  | 0.00  | 0.00  | 0.19  | 0.00  |
| <i>Moraxella atlantae</i>             | 0.00  | 0.00  | 0.00  | 0.00  | 0.00  | 0.00  | 0.00  | 0.00  | 0.00  | 0.01  |
| <i>Actinobacillus suis</i>            | 0.01  | 0.00  | 0.00  | 0.00  | 0.00  | 0.00  | 0.00  | 0.00  | 0.00  | 0.00  |
| <i>Aerococcus christensenii</i>       | 0.00  | 0.00  | 0.00  | 0.00  | 0.00  | 0.00  | 0.00  | 0.01  | 0.00  | 0.00  |
| Other                                 | 0.55  | 11.93 | 0.40  | 2.61  | 18.89 | 19.51 | 0.30  | 0.11  | 6.40  | 0.72  |
