# Supplementary material for: Association of Mycoplasma canis with Fertility Disorders in Dogs: A Case Study Supported by Clinical Examination, PCR, 16S Microbiota Profiling, and Serology
Source: MDPI journal article supplement (doi:10.3390/pathogens13050391), 2024-05-08
Supplement: s1 [file s1]

**Table S4.** Alpha diversity metrics of the 10 samples that were included in the final 16S microbiota profiling. FD, fertility disorder; CTRL, control; M, male; F, female.

| Study group | Patient number | Sex | Sample number <sup>a</sup> | Chao1 index | Shannon index | Simpson index | Observed OTUs |
|-------------|----------------|-----|----------------------------|-------------|---------------|---------------|---------------|
| FD          | 1              | M   | 6SI                        | 17.0000     | 0.9830        | 0.3270        | 14            |
|             | 6              | M   | 38SI                       | 197.7692    | 2.6827        | 0.6151        | 125           |
|             | 8              | M   | 43SI                       | 14.7500     | 1.1632        | 0.4367        | 14            |
|             | 9              | F   | 44SI                       | 47.0000     | 1.7829        | 0.5020        | 45            |
|             | 11             | F   | 49SI                       | 175.1538    | 3.9402        | 0.8543        | 137           |
| CTRL        | 16             | F   | 3SI                        | 160.6667    | 2.8504        | 0.6667        | 121           |
|             | 17             | M   | 4SI                        | 34.0000     | 1.0280        | 0.3810        | 22            |
|             | 23             | M   | 90SI                       | 12.0000     | 1.0236        | 0.4542        | 12            |
|             | 42             | F   | 45SI                       | 200.6667    | 2.2602        | 0.5281        | 138           |
|             | 43             | M   | 47SI                       | 24.2000     | 0.5928        | 0.1692        | 23            |

<sup>a</sup> in Figures 1 and 2 individual patients are represented with sample number (as assigned by Diversigen Inc.) instead of patient number
