# Supplementary material for: Association of Mycoplasma canis with Fertility Disorders in Dogs: A Case Study Supported by Clinical Examination, PCR, 16S Microbiota Profiling, and Serology
Source: MDPI journal article supplement (doi:10.3390/pathogens13050391), 2024-05-08
Supplement: s1 [file s1]

**Table S2.** Sperm parameters of four males from CTRL group.

| Patient number | Examination of the semen immediately after collection |       |                      |                   |                    | Microscopic examination of the semen |         |                       |                       | Eosin-nigrosin test [%]   |               | CASA analysis                             |                                           |                       |                                          |                                          |                      |                                           |                                           |                       |                                           |                                           |                       |
|----------------|-------------------------------------------------------|-------|----------------------|-------------------|--------------------|--------------------------------------|---------|-----------------------|-----------------------|---------------------------|---------------|-------------------------------------------|-------------------------------------------|-----------------------|------------------------------------------|------------------------------------------|----------------------|-------------------------------------------|-------------------------------------------|-----------------------|-------------------------------------------|-------------------------------------------|-----------------------|
|                | Colour                                                | Odour | Sperm count/mL       | Sperm volume [mL] | Sperm mobility [%] | MNS [%]                              | MAS [%] | MNS [%] after 3 hours | MAS [%] after 3 hours | at the time of collection | after 3 hours | % TM 0 h<br>(1 <sup>st</sup> measurement) | % TM 0 h<br>(2 <sup>nd</sup> measurement) | % TM 0 h<br>(average) | % PM 0h<br>(1 <sup>st</sup> measurement) | % PM 0h<br>(2 <sup>nd</sup> measurement) | % PM 0h<br>(average) | % TM 3 h<br>(1 <sup>st</sup> measurement) | % TM 3 h<br>(2 <sup>nd</sup> measurement) | % TM 3 h<br>(average) | % PM 3 h<br>(1 <sup>st</sup> measurement) | % PM 3 h<br>(2 <sup>nd</sup> measurement) | % PM 3 h<br>(average) |
| 19             | Milky white                                           | None  | 35.4×10 <sup>6</sup> | 3.4               | 85                 | 78                                   | 22      | 48                    | 52                    | 56                        | 88            | 19                                        | 43/39                                     | 41                    | 8                                        | 20/14                                    | 17                   | 24                                        | 29                                        | 27                    | 7                                         | 10                                        | 9                     |
| 20             | Milky white                                           | None  | 67.3×10 <sup>6</sup> | 5.2               | 90                 | 84                                   | 16      | 64                    | 36                    | 64                        | 73            | 87                                        | 81                                        | 84                    | 60                                       | 55                                       | 58                   | 89                                        | 89                                        | 89                    | 45                                        | 44/49                                     | 46                    |
| 21             | Milky white                                           | None  | 41.5×10 <sup>6</sup> | 2.5               | 90                 | 51                                   | 49      | 42                    | 58                    | 58                        | 66            | 16                                        | 19                                        | 18                    | 0                                        | 1                                        | 1                    | 19                                        | 18                                        | 19                    | 2                                         | 0                                         | 1                     |
| 22             | Milky white                                           | None  | 37.4×10 <sup>6</sup> | 6.0               | 90                 | 76                                   | 24      | 79                    | 21                    | 51                        | 82            | 93                                        | 92/92                                     | 92                    | 72                                       | 64/62                                    | 63                   | 92                                        | 89                                        | 91                    | 70                                        | 66                                        | 68                    |

MNS - morphologically normal sperm, MAS - morphologically abnormal sperm, TM – total motility, PM – progressive motility
