# Supplementary material for: Association of Mycoplasma canis with Fertility Disorders in Dogs: A Case Study Supported by Clinical Examination, PCR, 16S Microbiota Profiling, and Serology
Source: MDPI journal article supplement (doi:10.3390/pathogens13050391), 2024-05-08
Supplement: s1 [file s1]

**Table S1.** Representation of all numerical values of monitored hematological and biochemical parameters for patients in FD and CTRL group. FD, fertility disorder; CTRL, control.

| Study group | Patient number | Breed                          | Sex | Hematology and Chemistry  |                            |           |           |          |          |            |            |         |         |           |                           |          |         |           |            |           |          |           |          |                             |                              |                             |                            |                             |                            |               |                     |                        |             |
|-------------|----------------|--------------------------------|-----|---------------------------|----------------------------|-----------|-----------|----------|----------|------------|------------|---------|---------|-----------|---------------------------|----------|---------|-----------|------------|-----------|----------|-----------|----------|-----------------------------|------------------------------|-----------------------------|----------------------------|-----------------------------|----------------------------|---------------|---------------------|------------------------|-------------|
|             |                |                                |     | WBC [×10 <sup>9</sup> /L] | RBC [×10 <sup>12</sup> /L] | HGB [g/L] | HCT [L/L] | MCV [fL] | MCH [pg] | MCHC [g/L] | CHCM [g/L] | CH [pg] | RDW [%] | HDW [g/L] | PLT [×10 <sup>9</sup> /L] | MPV [fL] | PCT [%] | %NEUT [%] | %LYMPH [%] | %MONO [%] | %EOS [%] | %BASO [%] | %LUC [%] | #NEUT [×10 <sup>9</sup> /L] | #LYMPH [×10 <sup>9</sup> /L] | #MONO [×10 <sup>9</sup> /L] | #EOS [×10 <sup>9</sup> /L] | #BASO [×10 <sup>9</sup> /L] | #LUC [×10 <sup>9</sup> /L] | urea [mmol/L] | creatinine [μmol/L] | total proteins [mg/mL] | IgG [mg/mL] |
| FD          | 1              | Parson Russel terrier          | M   | 13.77                     | 7.97                       | 185       | 0.53      | 66.6     | 23.2     | 348        | 343        | 22.8    | 12.6    | 17.6      | 262                       | 8.6      | 0.23    | 68.4      | 20.7       | 4.5       | 6.2      | 0.2       | 0.1      | 9.41                        | 2.84                         | 0.62                        | 0.85                       | 0.03                        | 0.01                       | 6.60          | 67.50               | 54.95                  | 37.46       |
|             | 2              | Bernese mountain dog           | M   | 12.80                     | 7.63                       | 185       | 0.54      | 70.6     | 24.3     | 344        | 326        | 23.0    | 11.5    | 15.6      | 163                       | 14.2     | 0.23    | 65.1      | 23.2       | 4.5       | 6.9      | 0.2       | 0.1      | 7.93                        | 2.82                         | 0.55                        | 0.84                       | 0.02                        | 0.02                       | 9.20          | 101.85              | 57.57                  | 41.59       |
|             | 3              | German shepherd                | F   | 6.80                      | 8.55                       | 195       | 0.57      | 66.9     | 22.8     | 340        | 348        | 23.2    | 12.5    | 18.3      | 159                       | 13.7     | 0.22    | 54.3      | 32.1       | 6.4       | 6.6      | 0.3       | 0.3      | 3.69                        | 2.18                         | 0.44                        | 0.45                       | 0.02                        | 0.02                       | 5.65          | 78.74               | ND                     | ND          |
|             | 4              | German shepherd                | F   | 7.28                      | 7.98                       | 184       | 0.55      | 69.0     | 23.0     | 333        | 354        | 24.4    | 11.8    | 15.7      | 264                       | 10.4     | 0.27    | 50.4      | 24.6       | 4.8       | 19.7     | 0.2       | 0.2      | 3.67                        | 1.79                         | 0.35                        | 1.44                       | 0.02                        | 0.01                       | 5.33          | 63.43               | 55.12                  | 41.36       |
|             | 5              | Golden retriever               | F   | 10.75                     | 7.20                       | 170       | 0.47      | 65.9     | 23.5     | 357        | 369        | 24.3    | 13.7    | 18.8      | 286                       | 9.0      | 0.26    | 64.0      | 27.5       | 3.3       | 4.9      | 0.1       | 0.1      | 6.88                        | 2.96                         | 0.36                        | 0.53                       | 0.01                        | 0.01                       | 5.74          | 102.31              | 57.65                  | 36.95       |
|             | 6              | Golden retriever               | M   | 14.09                     | 6.45                       | 154       | 0.44      | 68.8     | 23.8     | 346        | 366        | 25.2    | 12.9    | 16.9      | 219                       | 10.3     | 0.23    | 64.3      | 27.1       | 3.7       | 4.6      | 0.1       | 0.2      | 9.05                        | 3.82                         | 0.52                        | 0.65                       | 0.01                        | 0.03                       | 7.21          | 137.00              | 58.04                  | 37.50       |
|             | 7              | Airedale terrier               | F   | 6.12                      | 8.44                       | 193       | 0.55      | 65.0     | 22.9     | 352        | 365        | 23.7    | 12.7    | 20.1      | 198                       | 8.8      | 0.17    | 63.9      | 25.9       | 3.9       | 6.0      | 0.3       | 0.1      | 3.91                        | 1.59                         | 0.24                        | 0.36                       | 0.02                        | 0.01                       | 12.23         | 89.00               | 54.33                  | 40.56       |
|             | 8              | Airedale terrier               | M   | 9.40                      | 7.60                       | 178       | 0.49      | 64.0     | 23.4     | 365        | 371        | 23.8    | 14.5    | 21.4      | 292                       | 9.4      | 0.28    | 60.1      | 29.0       | 3.6       | 6.9      | 0.2       | 0.1      | 5.65                        | 2.72                         | 0.34                        | 0.65                       | 0.02                        | 0.01                       | 14.73         | 85.00               | 56.99                  | 41.16       |
|             | 9              | German shepherd                | F   | 12.17                     | 6.57                       | 148       | 0.42      | 63.2     | 22.5     | 356        | 371        | 23.4    | 13.0    | 18.2      | 101                       | 14.7     | 0.15    | 62.6      | 24.7       | 6.0       | 6.2      | 0.1       | 0.3      | 7.62                        | 3.01                         | 0.74                        | 0.75                       | 0.02                        | 0.03                       | 5.88          | 98.00               | 56.66                  | 32.62       |
|             | 10             | American Staffordshire terrier | F   | 10.11                     | 7.13                       | 165       | 0.47      | 65.3     | 23.1     | 354        | 356        | 23.2    | 13.5    | 20.5      | 412                       | 11.9     | 0.49    | 73.3      | 15.6       | 6.1       | 3.8      | 0.5       | 0.7      | 7.41                        | 1.58                         | 0.62                        | 0.39                       | 0.05                        | 0.02                       | 4.81          | 92.20               | 56.33                  | 42.25       |
|             | 11             | Dogo Argentino                 | F   | 10.49                     | 2.40                       | 57        | 0.17      | 71.3     | 23.9     | 335        | 356        | 25.3    | 14.0    | 20.2      | 180                       | 13.9     | 0.25    | 71.9      | 18.4       | 6.6       | 2.7      | 0.2       | 0.3      | 7.54                        | 1.93                         | 0.69                        | 0.28                       | 0.02                        | 0.03                       | 3.06          | 61.42               | 31.53                  | 24.02       |
|             | 12             | Bernese mountain dog           | F   | 10.85                     | 8.03                       | 185       | 0.53      | 65.8     | 23.1     | 351        | 361        | 23.7    | 13.1    | 18.6      | 297                       | 11.6     | 0.35    | 74.1      | 19.1       | 5.3       | 1.1      | 0.1       | 0.1      | 8.04                        | 2.07                         | 0.58                        | 0.12                       | 0.01                        | 0.01                       | 6.49          | 109.06              | 57.69                  | 41.56       |
|             | 13             | Bernese mountain dog           | F   | 15.71                     | 7.29                       | 168       | 0.46      | 63.8     | 23.1     | 362        | 355        | 22.6    | 13.7    | 20.5      | 400                       | 13.8     | 0.55    | 77.4      | 14.1       | 4.8       | 3.3      | 0.1       | 0.1      | 12.7                        | 2.22                         | 0.76                        | 0.52                       | 0.02                        | 0.02                       | 5.96          | 150.10              | 56.48                  | 42.47       |
|             | 14             | Weimaraner                     | F   | 8.24                      | 6.52                       | 160       | 0.46      | 70.8     | 24.5     | 347        | 347        | 24.5    | 12.3    | 17.2      | 326                       | 10.2     | 0.33    | 77.6      | 14.5       | 4.8       | 2.9      | 0.2       | 0.1      | 6.39                        | 1.20                         | 0.39                        | 0.23                       | 0.02                        | 0.01                       | 4.32          | 80.03               | 48.33                  | 38.26       |
| CTRL        | 15             | English springer spaniel       | F   | 7.82                      | 6.84                       | 163       | 0.50      | 72.2     | 23.8     | 328        | 322        | 23.4    | 14.4    | 16.7      | 147                       | 16.5     | 0.24    | 70.3      | 17.1       | 5.7       | 6.4      | 0.2       | 0.3      | 5.50                        | 1.34                         | 0.45                        | 0.50                       | 0.02                        | 0.03                       | 6.36          | 96.47               | 55.02                  | 39.14       |
|             | 16             | Cross breed                    | F   | 9.61                      | 7.25                       | 175       | 0.52      | 72.1     | 24.1     | 334        | 328        | 23.6    | 11.6    | 14.7      | 290                       | 9.2      | 0.27    | 50.2      | 31.9       | 3.6       | 13.8     | 0.3       | 0.1      | 4.83                        | 3.06                         | 0.35                        | 1.32                       | 0.03                        | 0.01                       | 10.63         | 101.12              | 53.87                  | 41.49       |
|             | 17             | Japanese chin                  | M   | 8.11                      | 6.32                       | 148       | 0.45      | 70.4     | 23.4     | 332        | 321        | 22.6    | 11.8    | 15.3      | 289                       | 9.2      | 0.27    | 67.4      | 24.1       | 4.3       | 3.9      | 0.2       | 0.2      | 5.47                        | 1.95                         | 0.35                        | 0.31                       | 0.01                        | 0.01                       | 6.64          | 129.75              | 55.90                  | 36.67       |
|             | 19             | Scottish terrier               | M   | 7.21                      | 7.71                       | 163       | 0.48      | 62.7     | 21.2     | 338        | 326        | 20.4    | 13.6    | 17.8      | 293                       | 11.0     | 0.32    | 54.3      | 32.1       | 7.4       | 5.1      | 0.7       | 0.4      | 3.92                        | 2.32                         | 0.53                        | 0.37                       | 0.05                        | 0.03                       | 3.08          | 65.35               | 55.49                  | 40.98       |
|             | 20             | Scottish terrier               | M   | 14.40                     | 8.21                       | 181       | 0.54      | 65.8     | 22.1     | 336        | 325        | 21.3    | 12.9    | 17.3      | 234                       | 9.6      | 0.22    | 69.7      | 21.6       | 3.9       | 4.1      | 0.5       | 0.3      | 10.04                       | 3.11                         | 0.56                        | 0.58                       | 0.07                        | 0.04                       | 5.03          | 79.22               | 58.74                  | 42.72       |
|             | 21             | Rottweiler                     | M   | 14.35                     | 6.48                       | 142       | 0.42      | 65.0     | 21.9     | 337        | 323        | 21.0    | 12.2    | 17.9      | 481                       | 9.3      | 0.45    | 45.2      | 24.6       | 3.3       | 25.9     | 0.2       | 0.9      | 6.49                        | 3.53                         | 0.47                        | 3.71                       | 0.02                        | 0.13                       | 4.52          | 87.20               | 55.89                  | 41.28       |
|             | 22             | Rottweiler                     | M   | 15.60                     | 7.70                       | 174       | 0.50      | 65.4     | 22.7     | 346        | 335        | 21.8    | 11.8    | 16.7      | 311                       | 9.8      | 0.31    | 46.7      | 30.0       | 4.0       | 18.8     | 0.3       | 0.3      | 7.28                        | 4.69                         | 0.62                        | 2.93                       | 0.04                        | 0.04                       | 7.16          | 113.76              | 56.81                  | 41.98       |
|             | 23             | Dobermann                      | M   | 18.50                     | 5.82                       | 132       | 0.38      | 64.7     | 22.7     | 352        | 358        | 23.1    | 12.1    | 20.5      | 253                       | 11.4     | 0.29    | 78.4      | 9.3        | 7.8       | 4.4      | 0.0       | 0.1      | 14.50                       | 1.73                         | 1.45                        | 0.81                       | 0.00                        | 0.01                       | 22.70         | 312.80              | 56.73                  | 41.57       |
|             | 29             | Borzoi                         | M   | 11.04                     | 7.82                       | 190       | 0.55      | 70.9     | 24.3     | 343        | 356        | 25.2    | 12.3    | 17.2      | 194                       | 11.0     | 0.21    | 58.5      | 29.8       | 2.8       | 8.4      | 0.2       | 0.2      | 6.46                        | 3.30                         | 0.31                        | 0.93                       | 0.02                        | 0.02                       | 5.87          | 11.30               | 53.49                  | 42.16       |
|             | 32             | Cross breed                    | M   | 9.15                      | 5.60                       | 128       | 0.38      | 68.2     | 22.9     | 336        | 350        | 23.8    | 13.5    | 23.6      | 402                       | 12.8     | 0.52    | 69.7      | 18.1       | 4.8       | 7.1      | 0.1       | 0.1      | 6.37                        | 1.66                         | 0.44                        | 0.65                       | 0.01                        | 0.01                       | 5.33          | 57.57               | 57.50                  | 41.58       |
|             | 33             | Borzoi                         | M   | 7.40                      | 6.20                       | 150       | 0.44      | 70.2     | 24.1     | 344        | 356        | 24.9    | 13.1    | 16.8      | 216                       | 10.3     | 0.22    | 55.4      | 32.2       | 5.2       | 6.5      | 0.4       | 0.3      | 4.10                        | 2.39                         | 0.38                        | 0.48                       | 0.03                        | 0.02                       | 6.56          | 89.94               | 50.58                  | 36.87       |
|             | 40             | Golden retriever               | M   | 13.93                     | 6.78                       | 162       | 0.47      | 68.8     | 24.0     | 348        | 355        | 24.4    | 12.8    | 19.9      | 236                       | 9.2      | 0.22    | 59.5      | 33.7       | 4.5       | 1.6      | 0.4       | 0.3      | 8.29                        | 4.69                         | 0.63                        | 0.22                       | 0.06                        | 0.04                       | 10.30         | 87.00               | 54.09                  | 41.51       |
|             | 41             | Golden retriever               | F   | 9.00                      | 7.41                       | 178       | 0.51      | 68.6     | 24.0     | 349        | 360        | 24.7    | 12.4    | 16.0      | 460                       | 7.5      | 0.35    | 65.5      | 22.9       | 5.1       | 6.0      | 0.2       | 0.2      | 5.90                        | 2.06                         | 0.46                        | 0.54                       | 0.02                        | 0.01                       | 11.56         | 77.00               | 56.79                  | 37.72       |
|             | 42             | Cross breed                    | F   | 12.84                     | 8.59                       | 202       | 0.58      | 67.7     | 23.6     | 348        | 370        | 25.0    | 12.9    | 18.2      | 499                       | 10.1     | 0.50    | 62.6      | 20.4       | 3.7       | 12.6     | 0.5       | 0.1      | 8.04                        | 2.62                         | 0.48                        | 1.62                       | 0.07                        | 0.02                       | 4.13          | 70.50               | 54.85                  | 40.49       |
|             | 43             | Maltese dog                    | M   | 12.71                     | 5.62                       | 138       | 0.38      | 67.0     | 24.6     | 367        | 361        | 24.2    | 12.4    | 20.4      | 538                       | 9.3      | 0.50    | 67.2      | 22.0       | 4.9       | 5.4      | 0.1       | 0.3      | 8.54                        | 2.80                         | 0.62                        | 0.69                       | 0.01                        | 0.04                       | 9.47          | 84.80               | 50.65                  | 38.48       |
|             | 44             | Weimaraner                     | M   | 10.87                     | 7.77                       | 183       | 0.51      | 65.9     | 23.5     | 357        | 365        | 24.0    | 12.9    | 18.1      | 446                       | 10.7     | 0.48    | 64.2      | 14.9       | 4.0       | 16.7     | 0.2       | 0.2      | 6.98                        | 1.62                         | 0.44                        | 1.81                       | 0.02                        | 0.02                       | 8.95          | 76.13               | 57.12                  | 42.20       |
